# Supplementary material for: Observation and mechanism of cryo N2 cleavage by a tantalum cluster
Source: Royal Society of Chemistry journal article supplement (doi:10.1039/d0cp06208a), 2021-01-01
Supplement: d0cp06208a1.pdf [file d0cp06208a1.pdf]

## Electronic Supplementary Information

### **Observation and Mechanism of Cryo N<sub>2</sub> Cleavage by a Tantalum Cluster**

Daniela V. Fries, Matthias P. Klein, Annika Steiner, Marc H. Prosenc and Gereon Niedner-Schatteburg

*Fachbereich Chemie and Forschungszentrum OPTIMAS,  
Technische Universität Kaiserslautern, 67663 Kaiserslautern, Germany*

### Text 1: Detailed Experimental and Computational Methods

The experiments were performed with a customized Fourier transform ion cyclotron resonance (FT-ICR) mass spectrometer (Apex Ultra, Bruker Daltonics). This specific apparatus configuration allows us to generate cluster ions and isolate required mass complexes. Furthermore, we are able to adsorb reaction gases while trapping the ions in the hexapole cell and record mass spectra of the adsorbate complexes. Finally, we can examine the ions in the ICR cell by adsorption kinetics and infrared (multi) photon dissociation (IR-PD) spectroscopy.

First, we generate required cluster ions using a home-built laser vaporization (LVAP) source as described before.<sup>1,2</sup> The second harmonic of a pulsed Nd:YAG laser (Spitlight300, Innolas, 20 Hz) was used to evaporate tantalum atoms from a rotating tantalum foil (0.5 mm thick, 99.95 %, Alfa Aesar). Next, a gas pulse created from a piezoelectric valve<sup>3</sup> captures the hot plasma. While guided subsequently through the expansion channel (69 mm long, 2 mm diameter) the atoms and ions cool down and aggregate. Passing electrostatic lenses, the resulting cluster size distribution reaches the 90° ion beam bender. The bare clusters can be mass selected by a quadrupole mass filter and reach the cryogenic hexapole cell (10 K) subsequently. Therein, we are able to trap required mass complexes and introduce buffer or reaction gases. This can be done continuously or in pulses. For our investigations on tantalum clusters we only used continuously injection of up to  $2.6 \cdot 10^{-7}$  mbar  $N_2$ . To achieve sufficient cluster signal and thermalization, additional collision gas (He; up to  $6.8 \cdot 10^{-6}$  mbar) was introduced into the hexapole. After trapping the clusters and cluster adsorbates for various storage times (0 - 20 s), the ions are guided by electrostatic lenses into the FT-ICR cell for detection. If required, it is possible to isolate ion complexes within and introduce further reaction gas into this infinity cell.<sup>4</sup>

Reaction delay scans were recorded in order to investigate adsorption kinetics of nitrogen molecules to tantalum clusters. From this, we obtain a temporal evolution of mass spectra, which is evaluated by the program DataAnalysis 4.0 (Bruker Daltonics). The outgoing signal intensities and assigned storage times of each adsorbate complexes are input data for evaluation by evofit<sup>5</sup>. This program performs pseudo-first-order fits, from which we receive relative rate constants for adsorption ( $k_{(n,m)}$ ) and desorption steps ( $k_{-(n,m+1)}$ ), respectively.

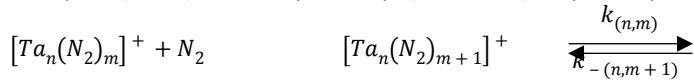

The relative rate constants ( $k_{(n,m)}$ ,  $k_{-(n,m+1)}$ ) determine the absolute rate constants ( $k_{(n,m)}^{abs}$ ,  $k_{-(n,m+1)}^{abs}$ ), the absolute collision gas number densities  $\rho_{N_2}(T)$  serving as the conversion factor.

$$k_{(n,m)}^{abs} = \frac{k_{(n,m)}}{\rho_{N_2}(T)} \quad k_{-(n,m+1)}^{abs} = \frac{k_{-(n,m+1)}}{\rho_{N_2}(T)}$$

Approximate values for  $\rho_{N_2}(T)$  are indirectly given by the pressure in the surrounding chamber  $P_c^{300K}$  and an effective geometry factor  $C_{app}$ .

$$\rho_{N_2}(T) = \frac{C_{app} \cdot P_c^{300K}}{k_B \cdot T_{300K}}$$

This geometry factor  $C_{app}$  shows a significant dependency on the temperature of the hexapole ion trap. We evaluated this factor to 1.8 at 26 K (uncertainty of  $\pm 50\%$ ) by numerous of previous kinetic studies of transition metal cluster cations with neutral reactants at cryo temperatures. Three models are used for determination of collision rates. The average dipole orientation (ADO) theory is based on a concept of a classical trajectory of a linear dipole in the field of a point charge.

$$k_{coll} = \frac{q}{2\epsilon_0\sqrt{\mu}} \cdot \left( \sqrt{\alpha} + c\mu_D \sqrt{\frac{2}{\pi k_B T}} \right)$$

Whereby  $\mu$  is the reduced mass of the cluster adsorbate complex,  $\mu_D$  stands for the dipole moment and  $\alpha$  is the polarizability. The parameter  $c$  can take values from 0 to 1 and can be expressed by the polarizability of the neutral reactant, here  $N_2$ . The volume  $\alpha$  and  $\mu_D$ .<sup>6</sup> It simplifies to the Langevin rate in the case of a negligible dipole moment. The ADO theory often underestimates the reaction rates for charged clusters with small molecules. Nevertheless, it is frequently used to calculate reaction rates for charged clusters with small molecules.<sup>7</sup> Therefore, Kummerlöwe and Beyer<sup>8</sup> devised two new models to determine collision rates of ionic clusters with neutral molecules. While the hard sphere average dipole orientation (HSA) model assumes a point charge in the center of the ionic cluster, the charge in the surface charge capture (SSC) theory is able to migrate to the cluster surface by its attractive interaction with the neutral collision partner.

For performing IR-PD experiments, a tunable IR laser ( $\delta t = 7$  ns) is coupled into the ICR cell. This laser is comprised of a KTP/KTA optical parametric oscillator/amplifier (OPO/OPA. LaserVision) system pumped by a pulsed injection seeded Nd:YAG laser (10 Hz, PL8000, Continuum). To obtain IR radiation ( $1100 - 2400$   $cm^{-1}$ ), an AgGaSe<sub>2</sub> crystal is used to generate the difference frequency (DF) between the OPA signal and idler waves. During irradiation with the IR laser, the ions are isolated and trapped in the ICR cell. Subsequently, every ion package is treated by 7 – 10 laser pulses (0.3 – 4.0 mJ/pulse) to yield sufficient fragment ions. A series of fragmentation mass spectra is recorded while continuously scanning the IR wavelength.

The measured IR-PD signal is evaluated as  $\sum_I F_I / (\sum_I F_I + \sum_I P_I)$ , where  $F_I$  and  $P_I$  represent fragment and parent ion signal, respectively. Finally, the determined fragmentation efficiency is plotted as a function of laser frequency in order to obtain an IR-PD spectrum.

All quantum chemical calculations are carried out by the program package Gaussian 09<sup>9</sup> and the Gaussian 16 suite<sup>10</sup>. We employed the PBE0 functional<sup>11, 12</sup> for nonlocal corrections and the def2-TZVP basis set<sup>13, 14</sup> for all atoms. We did so in continuation previous studies which have succeeded to model N<sub>2</sub> adsorption before, as e.g. in the cases of Rhodium clusters<sup>15</sup> and Nickel clusters<sup>16, 17</sup>. We did so in continuation of previous studies which have succeeded to model N<sub>2</sub> adsorption before, as e.g. in the cases of Rhodium clusters<sup>15</sup> and Nickel clusters<sup>16, 17</sup>. Moreover, we verified our choice of method by employing a multitude of available exchange correlation functionals, and CC2 calculations on top (cf. Fig. S8) along some part of the reaction path of initial N<sub>2</sub> activation along three local minima (I2<sub>(4,1)</sub> and I3<sub>(4,1)</sub> and P<sub>vic(4,1)</sub>) and both intermediate transition states (TS23<sub>(4,1)</sub> and TS3P<sub>vic(4,1)</sub>). It shows that the optimized minimum structures and transition states are robust (for a survey of some critical geometric parameters refer to Table S15 in the supplement), as well as the relative energies by less than 30 kJ/mol (cf. Table S14). We take this as a valid gauge of the chosen level of theory, PBE0/def2-TZVP. All stationary states were checked by second derivative calculations revealing no (minima) and only one (transition state) imaginary frequency. Reaction paths were searched by QST2/3<sup>18</sup> or linear transit methods<sup>19</sup> and after location and optimization of the transition states scanned by IRC calculations.<sup>20</sup> Orbital analyses were performed using Molecular Orbitals as well as Natural Bonding Orbitals as employed in the Gaussian 16 program.<sup>21, 22</sup>

## Text 2: Nomenclature for the Ta<sub>4</sub><sup>+</sup> cluster and its adsorbates

There are 14 complexes of the form [Ta<sub>4</sub>(N<sub>2</sub>)<sub>m</sub>]<sup>+</sup>, where *m* stands for the number of N<sub>2</sub> molecules attached to the cluster. The index *m* ranges from 0 to 13. For ease of reference, we use the notation (4,*m*). The 14 complexes are interlinked by 13 processes, respectively, in the form of adsorption and desorption reactions. The rate constants for these adsorption and desorption processes are labelled as *k<sub>m</sub>* and *k<sub>(m+1)</sub>*. Therefore, *m* can assume values from 0 to 12.

We use e.g. *k<sub>0</sub>* := *k<sub>0→1</sub>* for the adsorption step:

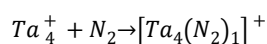

and *k<sub>-1</sub>* := *k<sub>1→0</sub>* for the desorption step:

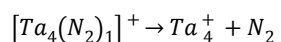

To simplify the description of the products, we use the following subscript abbreviations for the relative positions of the resulting nitride ligands: gem (geminal, on the same Ta-Ta edge), vic (vicinal, on neighbored Ta-Ta edges), and dis (distal, on opposite edges of the Ta<sub>4</sub><sup>+</sup> tetrahedron).

## Text 3: Detailed discussion of the intermediate I1<sub>(4,1)</sub>

According to an NBO analysis, there are minor contributions from 6*s* and 6*p* orbitals which we omit in further discussion. The Ta1 atom provides for five 5*d* electrons. It utilizes three of these to form three σ-bonds to the remaining three Ta atoms of the cluster. The Ta1 atom thereby experiences a local weak ML3 ligand field splitting of the 5*d* orbitals which destabilizes the thus empty *d<sub>z<sup>2</sup></sub>* orbital.<sup>23</sup> The remaining two *d* electrons fill the *d<sub>xz</sub>* orbital. This *d<sub>xz</sub>* orbital is a lone pair orbital at the Ta1 atom within the NBO framework. The N<sub>2</sub> ligand's lone pair donates towards the empty *d<sub>z<sup>2</sup></sub>* orbital which locates perpendicular to the (Ta1 Ta2 Ta3) plane. The bonding of the N<sub>2</sub> ligand to the Ta1 atom seems to increase the Ta1-Ta4 bond length from 2.52 Å in Ta<sub>4</sub><sup>+</sup> to 2.72 Å in I1<sub>(4,1)</sub>, and the N<sub>2</sub> binding energy amounts to 66 kJ/mol (in the doublet state).

## Text 4: Detailed discussion of the intermediate I2<sub>(4,1)</sub>

The stabilization of I2<sub>(4,1)</sub> with respect to I1<sub>(4,1)</sub> is accompanied by a reduction of d(Ta1-N1) to 2.02 Å (-0.11 Å with respect to I1<sub>(4,1)</sub>), an elongation of d(N1-N2) to 1.19 Å (+0.08 Å), and a tilting of the N<sub>2</sub> ligand towards Ta2. The result is a bridged μ<sub>2</sub>-κN1:κN1κN2 structure with d(Ta2-N1) = 2.12 Å (-1.00 Å with respect to I1<sub>(4,1)</sub>) and d(Ta2-N2) = 2.18 Å (-1.80 Å). Note, that this coordination motif corresponds to a tantalum complex with a bridging N<sub>2</sub> unit that is coordinated both side on and end on<sup>23, 24</sup>. Related complexes with I2 type bonding motifs were reported for Gd<sup>25</sup>, Sc<sup>26</sup>, and V<sup>27</sup>. By the tilting, the distance d(Ta1-Ta4) in I2<sub>(4,1)</sub> decreases to 2.56 Å (-0.16 Å with respect to I1<sub>(4,1)</sub>) due to the diminished donation of the coordinating nitrogen lone pair electron density into the Ta1 T4 σ\*-antibonding orbital. In effect, the Ta1-Ta4 bond strengthens and the distance between the Ta atoms shrinks. Note, that at this point there are no Ta3-N1 and Ta3-N2 interactions.

## Text 5: Detailed discussion of the intermediate I3<sub>(4,1)</sub>

The structure of I3<sub>(4,1)</sub> reveals the bridged μ<sub>3</sub>-κN1:κN1,N2:κN1,N2 bonded nitrogen ligand which comprises an elongated N1-N2 bond of 1.43 Å (+0.24 Å with respect to I2<sub>(4,1)</sub>). The Ta1-N1 distance has decreased to 1.92 Å (-0.10 Å), as well as the Ta2-N2 distances of 2.00 Å (-0.17 Å) and Ta3-N2 distance of 1.96 Å (-2.29 Å). The Ta2-Ta3 bond has elongated from 2.57 Å, I2<sub>(4,1)</sub>, to 2.87 Å, I3<sub>(4,1)</sub>, (+0.30 Å), and the Ta1-Ta3 bond from 2.56 Å, I2<sub>(4,1)</sub>, to 2.92 Å, I3<sub>(4,1)</sub>, (+0.36 Å); the charge density of both bonds dilutes significantly. In parallel, the N1-N2 bond elongates from 1.19 Å, I2<sub>(4,1)</sub>, to 1.43 Å, I3<sub>(4,1)</sub>, (+0.24 Å). Note, that this points to a mere N-N single bond distance as e.g. found in hydrazine<sup>28</sup> and related complexes (1.45 Å). Thus, the adaptive Ta<sub>4</sub><sup>+</sup> cluster enables a bridged μ<sub>3</sub> coordination of N<sub>2</sub> (cf. I3 in Figure 3). The concomitant cleavage of the N<sub>2</sub> triple bond is accompanied by a relaxation of the Ta<sub>4</sub><sup>+</sup> scaffold.

## Text 6: Detailed discussion of the product P<sub>vic(4,1)</sub>

The four Ta N bonds in P<sub>vic(4,1)</sub> possess almost equal bond length on the order of 1.84 - 1.90 Å. Minor variations might originate from partial double and single bond characters. Accordingly, the two N bridged Ta1-Ta2 and Ta2-Ta3 bonds are equally elongated to 2.81 Å as compared to the non bridged Ta-Ta bonds, e.g. d(Ta1 Ta3) = 2.69 Å.

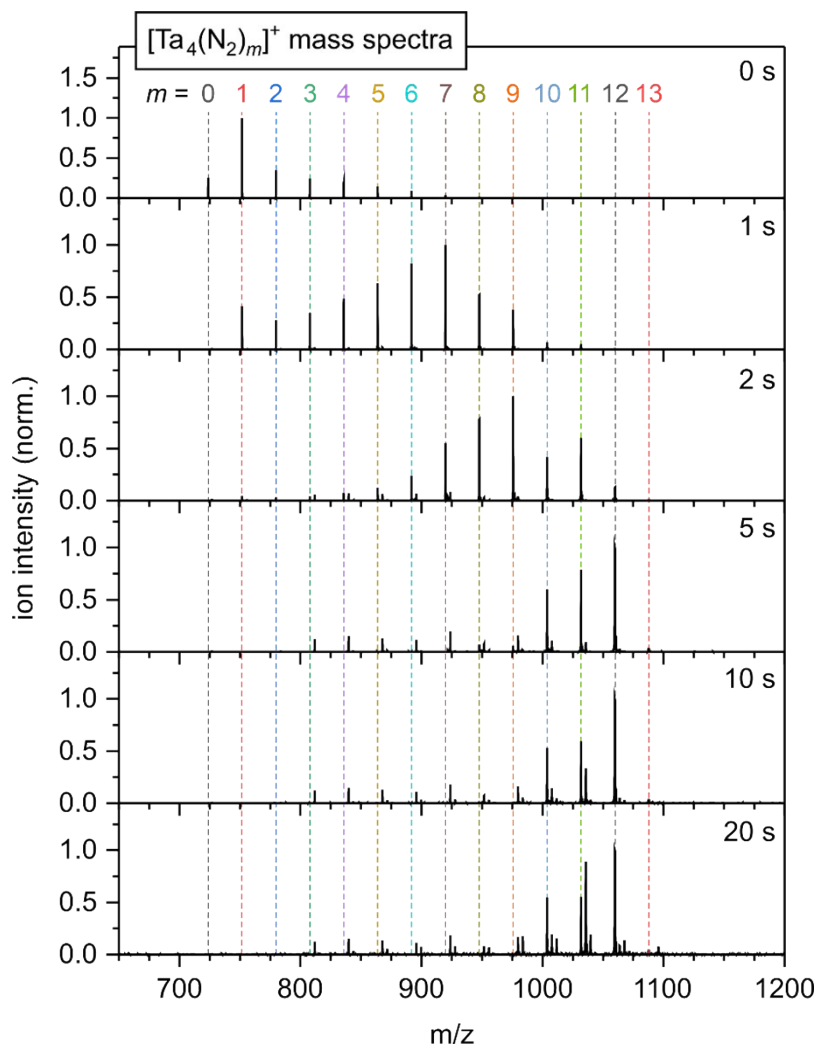

**Fig. S1.** Temporal evolution of the FT-ICR mass spectra of  $\text{Ta}_4^+$  cluster complexes at 26 K and various storage times in the cryogenic hexapole ion trap exposed to an  $\text{N}_2$  pressure of  $2.6 \cdot 10^{-7}$  mbar. The least quantifiable maximum of  $\text{N}_2$  adsorption to  $\text{Ta}_4^+$  clusters from the carried-out measurement is 13  $\text{N}_2$ .

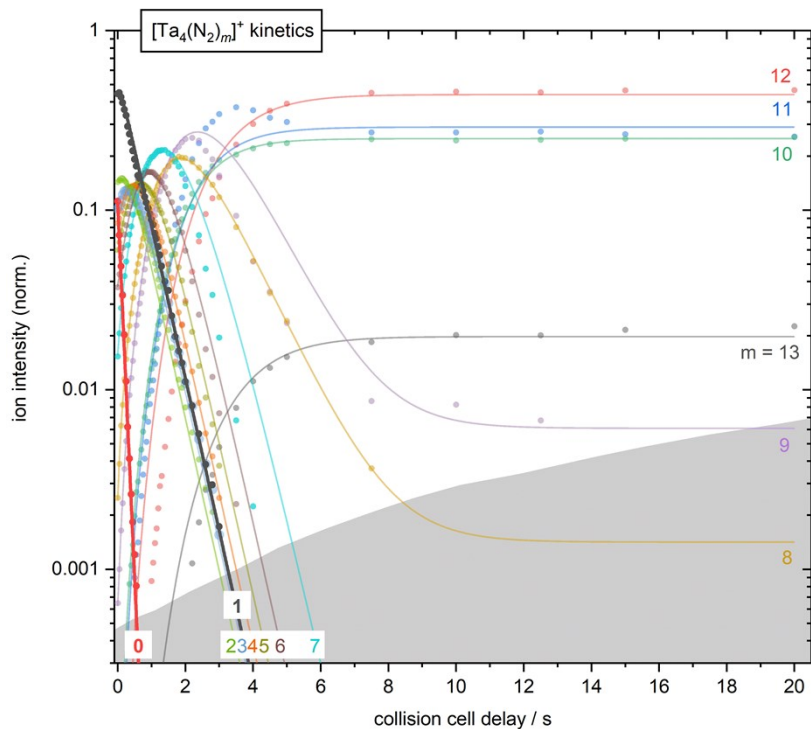

**Fig. S2.** Isothermal kinetics of  $N_2$  adsorption by mass-selected  $Ta_4^+$  clusters at 26 K, He buffer gas ( $6.8 \cdot 10^{-6}$  mbar) and an exposure of  $2.6 \cdot 10^{-7}$  mbar  $N_2$ . The experimental data (solid dots) and the fits (solid lines) assume pseudo-first order kinetics for the  $N_2$  adsorption in up to 13 consecutive steps. The kinetics of first and second  $N_2$  adsorption are highlighted. The grey-shaded area indicates the background noise level. Corresponding rate constants of the pseudo-first order fits for each adsorption/desorption is shown in the Supporting Information (cf. Fig. S3)

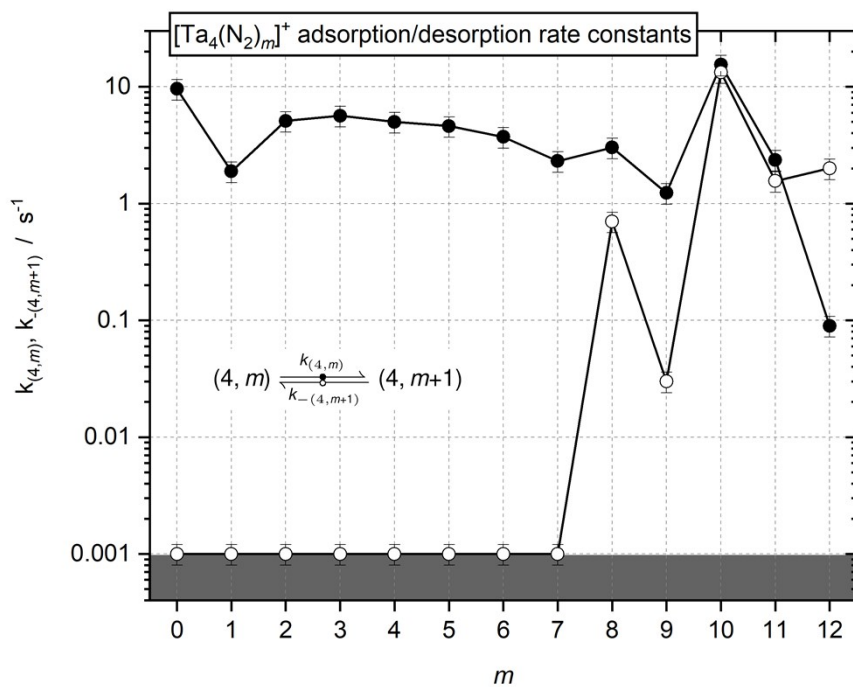

**Fig. S3.** Observed rate constants resulting from pseudo-first-order fits of measured kinetic data of the  $Ta_4^+$  cluster complex as a function of stepwise  $N_2$  adsorption. Filled circles show the rate of adsorption ( $k_{(4,m)}$ ). Desorption rates ( $k_{-(4,m+1)}$ ) are represented by open circles. The gray shaded area indicates the background noise level.

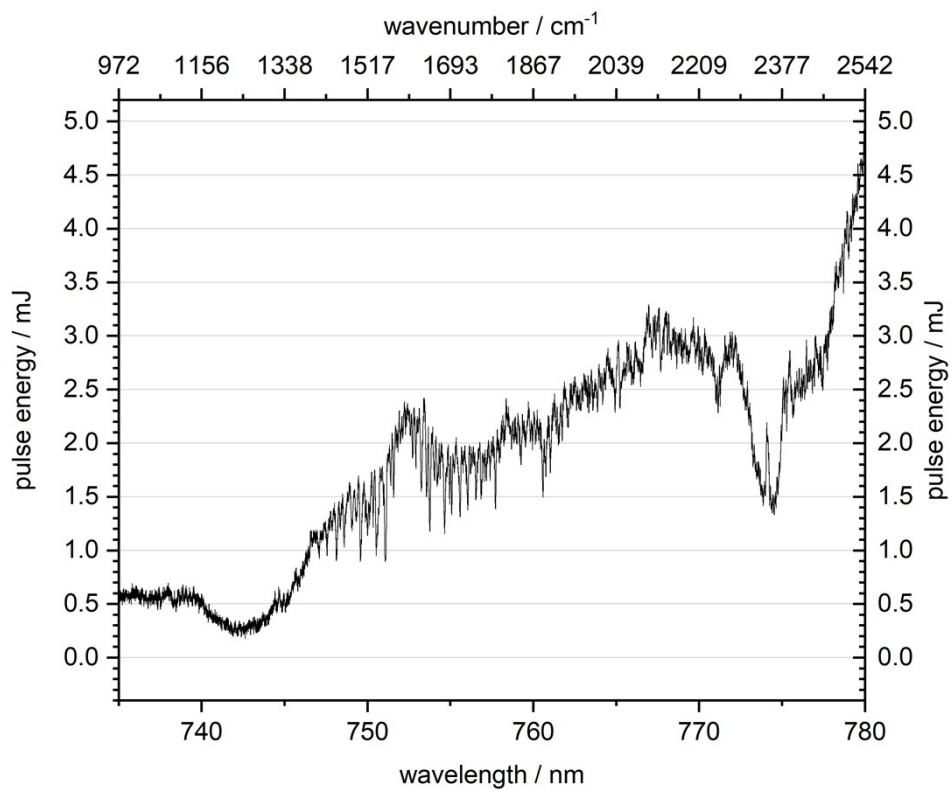

**Fig. S4.** Laser pulse energy in dependency of wavelength and wavenumber.

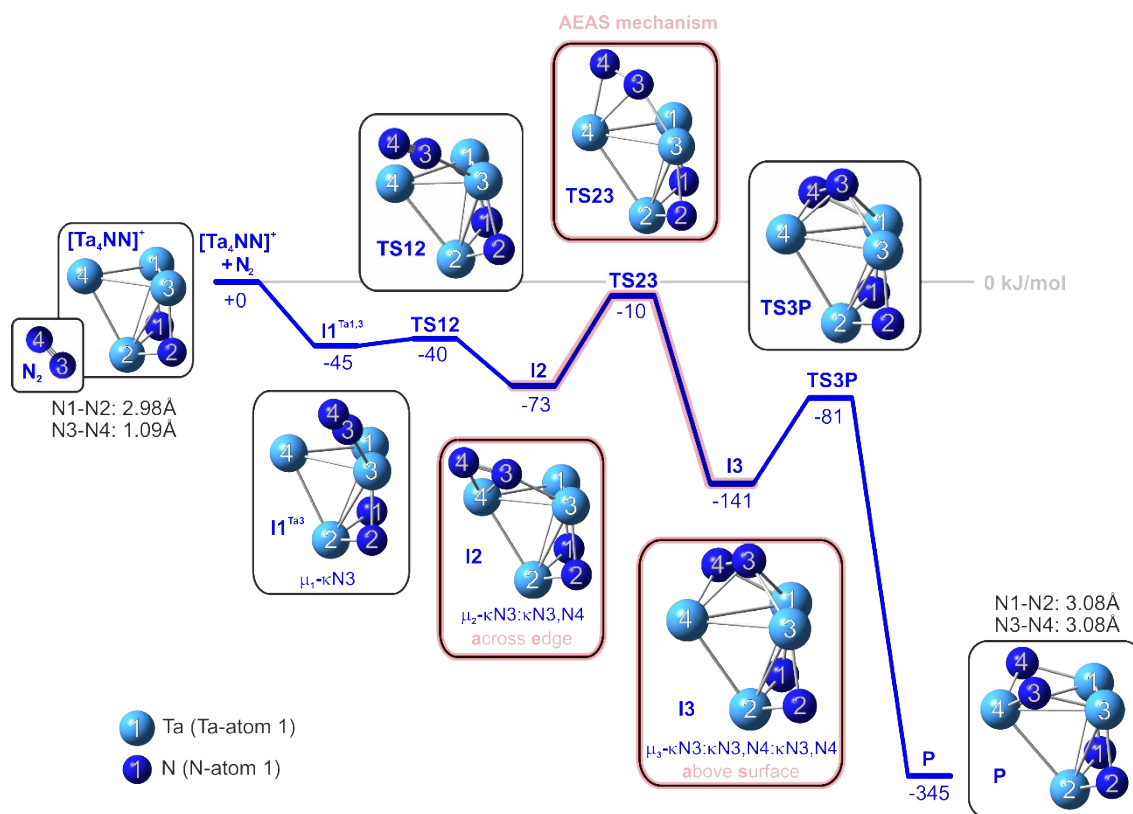

**Fig. S5.** A reaction pathway of second N<sub>2</sub> cleavage on a [Ta<sub>4</sub>NN]<sup>+</sup> cluster complex (adsorption site: Ta3). The torsional reorganization of the AEAS mechanism is highlighted. For reasons of clarity, the nomenclature is presented in a shortened form (e.g. here I1 stands for I1<sub>(4,2)</sub> or rather I1<sup>Ta3</sup><sub>(4,2)</sub>).



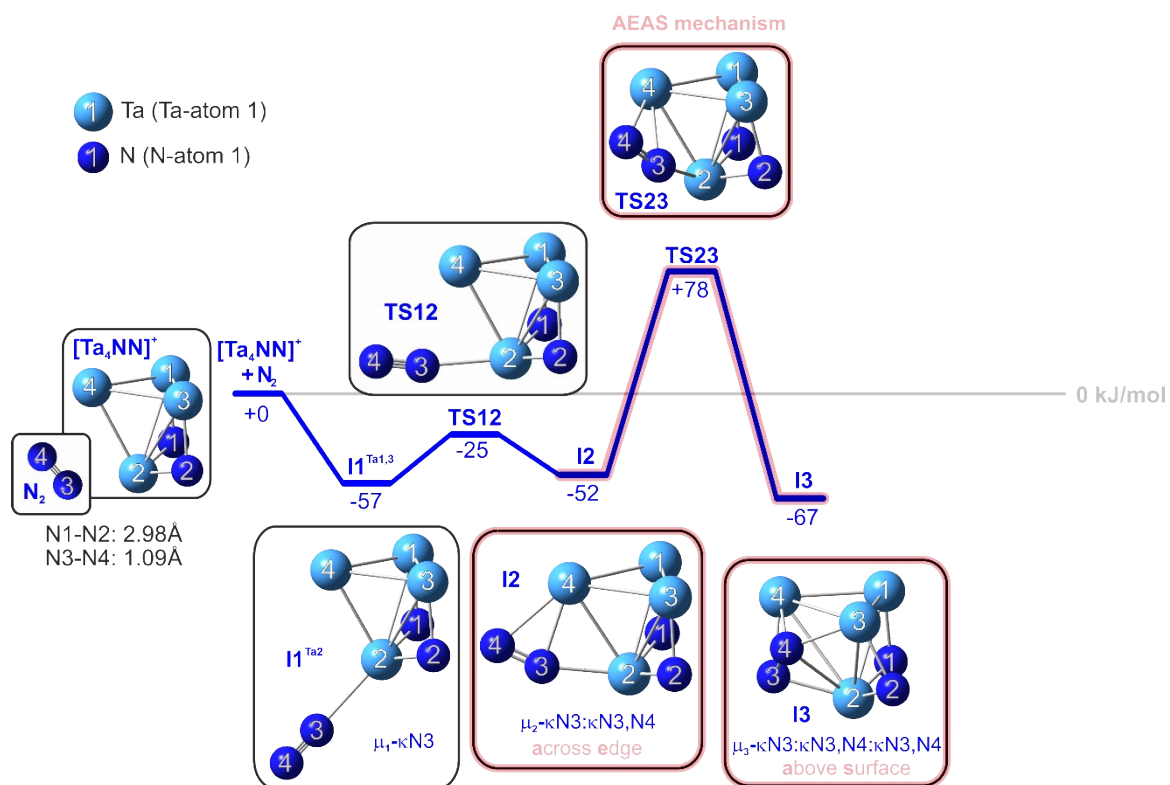

**Fig. S6.** A reaction pathway of second  $\text{N}_2$  cleavage on a  $[\text{Ta}_4\text{NN}]^+$  cluster complex (adsorption site: Ta2). The torsional reorganization of the AEAS mechanism is highlighted. For reasons of clarity, the nomenclature is presented in a shortened form (e.g. here I1 stands for  $\text{I1}_{(4,2)}$  or rather  $\text{I1}^{\text{Ta2}}_{(4,2)}$ ).

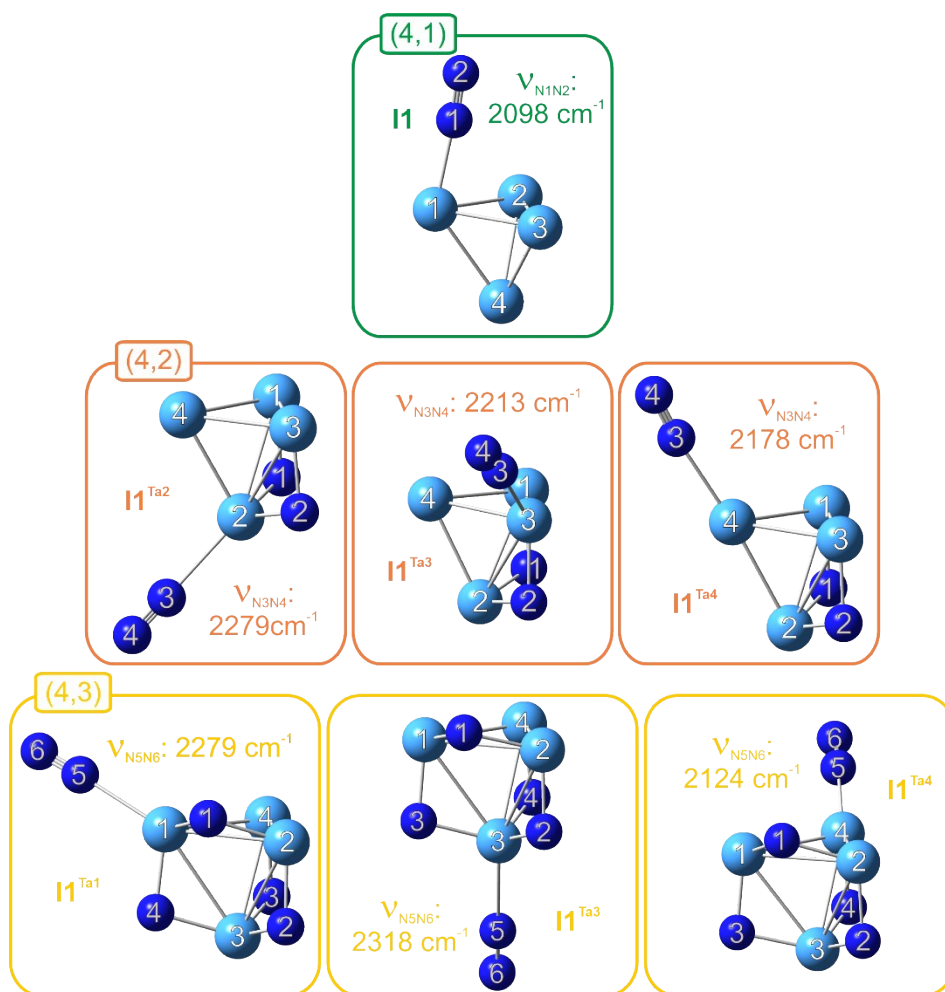

**Fig. S7.** Model structures with an end-on bound  $N_2$  molecule ( $\mu_1$ - $\eta^1N_1$  coordination) obtained from DFT calculations on the first, second and third  $N_2$  activation pathway. Their scaled vibrational frequencies are within the range of  $2100\text{ cm}^{-1}$  to  $2300\text{ cm}^{-1}$  (scale factor: 0.9376).

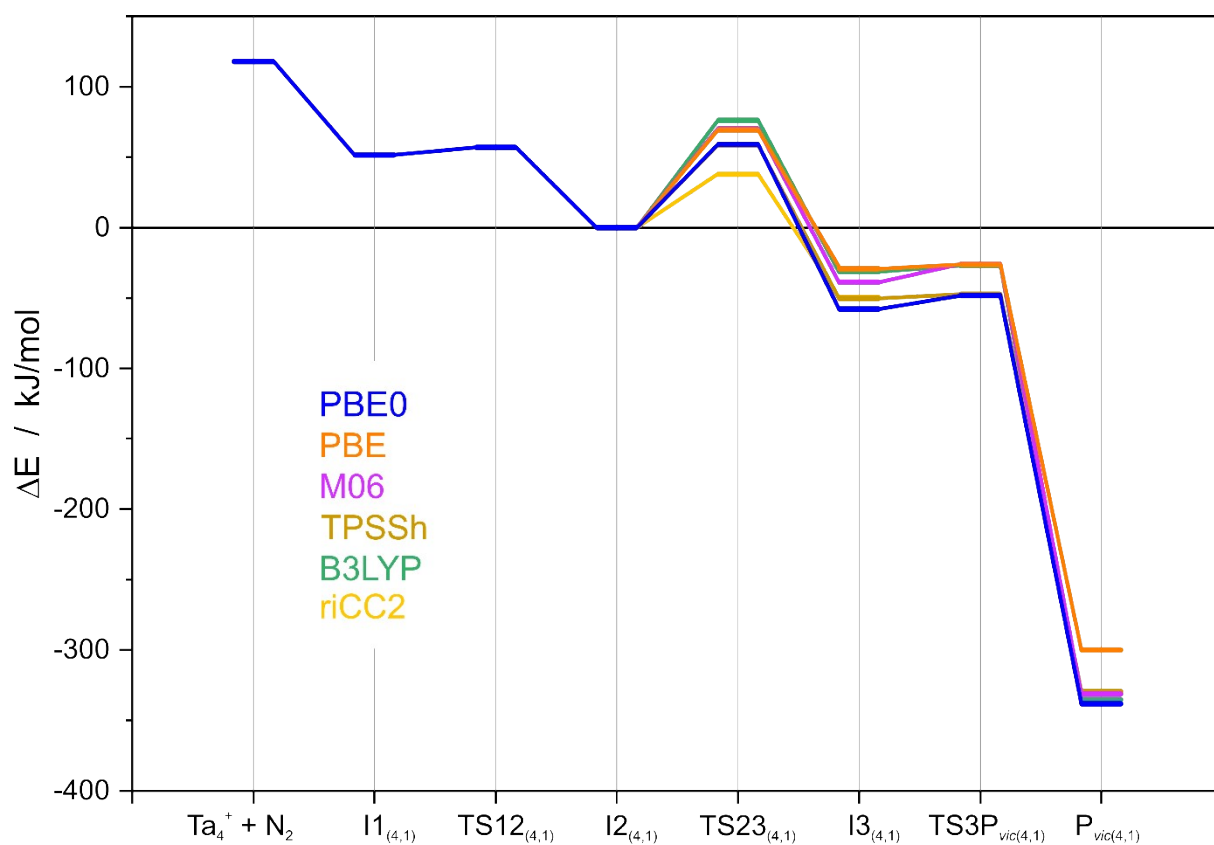

**Fig. S8.** Reaction path of initial N<sub>2</sub> activation in the case of (n,m)=(4,1) by DFT calculations with a multitude of exchange correlation functionals, and by CC2 calculations. For numerical values refer to Table S14.

**Table S1.** Relative pseudo-first-order rate constants, absolute rate constants, collision rates and sticking probabilities for the N<sub>2</sub> adsorption on (4,*m*) clusters at a N<sub>2</sub> pressure of 2.6 · 10<sup>-7</sup> mbar. Gray shaded elements highlight sticking probabilities  $\gamma > 1$ . Orange highlighted values are likely to be questionable as the limits of *evofit* (5) (fit program) have been exceeded.

| <b>2.6 · 10<sup>-7</sup> mbar N<sub>2</sub></b> |                                                        |                             |                                                       |          |
|-------------------------------------------------|--------------------------------------------------------|-----------------------------|-------------------------------------------------------|----------|
| <i>m</i>                                        | $k_{\text{coll}}(4,m) / 10^{-16} \text{ m}^3/\text{s}$ | $k_{(4,m)} / \text{s}^{-1}$ | $k_{\text{abs}}(4,m) / 10^{-16} \text{ m}^3/\text{s}$ | $\gamma$ |
| 0                                               | 6.00                                                   | 9.58                        | 8.48                                                  | 1.41     |
| 1                                               | 6.00                                                   | 1.88                        | 1.67                                                  | 0.28     |
| 2                                               | 5.99                                                   | 5.10                        | 4.51                                                  | 0.75     |
| 3                                               | 5.99                                                   | 5.65                        | 5.00                                                  | 0.84     |
| 4                                               | 5.99                                                   | 5.01                        | 4.43                                                  | 0.74     |
| 5                                               | 5.98                                                   | 4.60                        | 4.07                                                  | 0.68     |
| 6                                               | 5.98                                                   | 3.72                        | 3.29                                                  | 0.55     |
| 7                                               | 5.98                                                   | 2.31                        | 2.05                                                  | 0.34     |
| 8                                               | 5.97                                                   | 3.02                        | 2.67                                                  | 0.45     |
| 9                                               | 5.97                                                   | 1.23                        | 1.09                                                  | 0.18     |
| 10                                              | 5.97                                                   | 15.43                       | 13.7                                                  | 2.29     |
| 11                                              | 5.97                                                   | 2.37                        | 2.09                                                  | 0.35     |
| 12                                              | 5.96                                                   | 0.09                        | 0.08                                                  | 0.01     |

**Table S2.** Calculated distances in Å of atoms within Ta<sub>4</sub><sup>+</sup>, N<sub>2</sub> and [Ta<sub>4</sub>(N<sub>2</sub>)<sub>1</sub>]<sup>+</sup> in the doublet state along the activation pathway of the first N<sub>2</sub> molecule on a Ta<sub>4</sub><sup>+</sup> cluster complex.

|                | [Ta <sub>4</sub> ] <sup>+</sup>                                                   | N <sub>2</sub>                                                                    | I1 <sub>(4,1)</sub>                                                               | TS12 <sub>(4,1)</sub>                                                             | I2 <sub>(4,1)</sub>                                                               | TS23 <sub>(4,1)</sub>                                                             | I3 <sub>(4,1)</sub>                                                                | TS3P <sub>(4,1)vic</sub>                                                            | TS3P <sub>(4,1)gem</sub>                                                            | P <sub>(4,1)vic</sub>                                                               | TSP <sub>vic</sub> P <sub>gem</sub>                                                 | P <sub>(4,1)gem</sub>                                                               | TSP <sub>vic</sub> P <sub>dis</sub>                                                 | P <sub>(4,1)dis</sub>                                                               |
|----------------|-----------------------------------------------------------------------------------|-----------------------------------------------------------------------------------|-----------------------------------------------------------------------------------|-----------------------------------------------------------------------------------|-----------------------------------------------------------------------------------|-----------------------------------------------------------------------------------|------------------------------------------------------------------------------------|-------------------------------------------------------------------------------------|-------------------------------------------------------------------------------------|-------------------------------------------------------------------------------------|-------------------------------------------------------------------------------------|-------------------------------------------------------------------------------------|-------------------------------------------------------------------------------------|-------------------------------------------------------------------------------------|
|                |  |  |  |  |  |  |  |  |  |  |  |  |  |  |
| <b>Ta1-Ta2</b> | 2.64281                                                                           |                                                                                   | 2.53029                                                                           | 2.53803                                                                           | 2.63597                                                                           | 2.58405                                                                           | 2.51053                                                                            | 2.9816                                                                              | 2.58642                                                                             | 2.80981                                                                             | 2.81177                                                                             | 2.54861                                                                             | 2.9854                                                                              | 2.65808                                                                             |
| <b>Ta2-Ta3</b> | 2.52474                                                                           |                                                                                   | 2.54831                                                                           | 2.54441                                                                           | 2.57044                                                                           | 2.4606                                                                            | 2.87221                                                                            | 2.80459                                                                             | 2.9635                                                                              | 2.80852                                                                             | 3.05656                                                                             | 2.84528                                                                             | 2.80194                                                                             | 2.77209                                                                             |
| <b>Ta3-Ta4</b> | 2.55383                                                                           |                                                                                   | 2.52596                                                                           | 2.54142                                                                           | 2.60882                                                                           | 2.51033                                                                           | 2.46294                                                                            | 2.55785                                                                             | 2.61668                                                                             | 2.58246                                                                             | 2.57717                                                                             | 2.5485                                                                              | 2.55304                                                                             | 2.65861                                                                             |
| <b>Ta1-Ta4</b> | 2.52494                                                                           |                                                                                   | 2.72035                                                                           | 2.71223                                                                           | 2.55912                                                                           | 2.58949                                                                           | 2.5635                                                                             | 2.57129                                                                             | 2.46981                                                                             | 2.57679                                                                             | 2.55691                                                                             | 2.67861                                                                             | 2.60097                                                                             | 2.66287                                                                             |
| <b>Ta2-Ta4</b> | 2.52393                                                                           |                                                                                   | 2.52619                                                                           | 2.51859                                                                           | 2.57036                                                                           | 2.77776                                                                           | 2.54261                                                                            | 2.44979                                                                             | 2.61663                                                                             | 2.61516                                                                             | 2.55519                                                                             | 2.54854                                                                             | 2.54783                                                                             | 2.65895                                                                             |
| <b>Ta1-Ta3</b> | 2.5242                                                                            |                                                                                   | 2.53039                                                                           | 2.52825                                                                           | 2.55924                                                                           | 2.59023                                                                           | 2.91928                                                                            | 2.51185                                                                             | 2.58647                                                                             | 2.69019                                                                             | 2.66673                                                                             | 2.54863                                                                             | 2.67202                                                                             | 2.65872                                                                             |
| <b>Ta1-N1</b>  |                                                                                   |                                                                                   | 2.12606                                                                           | 2.08579                                                                           | 2.0197                                                                            | 2.02836                                                                           | 1.91925                                                                            | 1.91264                                                                             | 2.43664                                                                             | 1.83777                                                                             | 1.85736                                                                             | 1.99248                                                                             | 1.8178                                                                              | 1.85619                                                                             |
| <b>Ta1-N2</b>  |                                                                                   |                                                                                   |                                                                                   |                                                                                   |                                                                                   |                                                                                   |                                                                                    |                                                                                     |                                                                                     |                                                                                     |                                                                                     |                                                                                     |                                                                                     |                                                                                     |
| <b>Ta2-N1</b>  |                                                                                   |                                                                                   | 3.1238                                                                            | 2.51358                                                                           | 2.12104                                                                           | 2.16581                                                                           | 2.19976                                                                            | 2.10592                                                                             | 1.94684                                                                             | 1.89471                                                                             | 1.87219                                                                             | 2.00009                                                                             | 1.94786                                                                             |                                                                                     |
| <b>Ta2-N2</b>  |                                                                                   |                                                                                   | 3.9722                                                                            |                                                                                   | 2.17607                                                                           | 2.10638                                                                           | 2.00254                                                                            | 1.92269                                                                             | 1.96373                                                                             | 1.89543                                                                             | 1.95083                                                                             | 1.99998                                                                             | 1.87395                                                                             | 1.85724                                                                             |
| <b>Ta3-N1</b>  |                                                                                   |                                                                                   |                                                                                   |                                                                                   | 3.61223                                                                           |                                                                                   | 2.2019                                                                             | 2.29594                                                                             | 1.94692                                                                             |                                                                                     |                                                                                     | 2.00003                                                                             |                                                                                     |                                                                                     |
| <b>Ta3-N2</b>  |                                                                                   |                                                                                   |                                                                                   |                                                                                   | 4.24793                                                                           |                                                                                   | 1.95998                                                                            | 1.9417                                                                              | 1.96381                                                                             | 1.83664                                                                             | 1.84741                                                                             | 1.99997                                                                             | 1.85766                                                                             | 1.85718                                                                             |
| <b>Ta4-N1</b>  |                                                                                   |                                                                                   |                                                                                   |                                                                                   |                                                                                   |                                                                                   |                                                                                    |                                                                                     |                                                                                     |                                                                                     |                                                                                     |                                                                                     |                                                                                     | 1.85593                                                                             |
| <b>Ta4-N2</b>  |                                                                                   |                                                                                   |                                                                                   |                                                                                   |                                                                                   |                                                                                   |                                                                                    |                                                                                     |                                                                                     |                                                                                     |                                                                                     | 1.99291                                                                             |                                                                                     |                                                                                     |
| <b>N1-N2</b>   |                                                                                   | 1.08948                                                                           | 1.10833                                                                           | 1.12038                                                                           | 1.18967                                                                           | 1.22901                                                                           | 1.43062                                                                            | 1.66522                                                                             | 1.83186                                                                             | 2.97767                                                                             |                                                                                     | 2.71973                                                                             |                                                                                     | 4.36624                                                                             |

**Table S3.** Calculated energies of the cluster adsorbate complex  $[\text{Ta}_4(\text{N}_2)_1]^+$  in the doublet and quartet state along the activation pathway of the first  $\text{N}_2$  molecule on a  $\text{Ta}_4^+$  cluster complex.

|                                        | doublet state |                     | quartet state |                     |
|----------------------------------------|---------------|---------------------|---------------|---------------------|
|                                        | energy E / Ha | $\Delta E$ / kJ/mol | energy E / Ha | $\Delta E$ / kJ/mol |
| $\text{Ta}_4^+, \text{N}_2$            | -337.05023    | 0                   | -337.035182   | 40                  |
| $\text{I1}_{(4,1)}$                    | -337.07549    | -66                 | -337.054152   | -10                 |
| $\text{TS12}_{(4,1)}$                  | -337.07342    | -61                 | -337.050021   | 1                   |
| $\text{I2}_{(4,1)}$                    | -337.09514    | -118                | -337.074784   | -64                 |
| $\text{TS23}_{(4,1)}$                  | -337.07269    | -59                 | -337.056313   | -16                 |
| $\text{I3}_{(4,1)}$                    | -337.11716    | -176                | -337.10029    | -131                |
| $\text{TS3P}_{vic(4,1)}$               | -337.1135     | -166                | -337.094742   | -117                |
| $\text{P}_{vic(4,1)}$                  | -337.22397    | -456                | -337.192304   | -373                |
| $\text{TSP}_{vic} \text{P}_{dis(4,1)}$ | -337.20507    | -407                | -337.175449   | -329                |
| $\text{P}_{dis(4,1)}$                  | -337.22438    | -457                | -337.205372   | -407                |
| $\text{TSP}_{gem} \text{P}_{vic(4,1)}$ | -337.20852    | -416                | -337.17545    | -329                |
| $\text{TS3P}_{gem(4,1)}$               | -337.09007    | -105                | -337.05264    | -6                  |
| $\text{P}_{gem(4,1)}$                  | -337.22681    | -464                | -337.179527   | -339                |

**Table S4.** Calculated NPA charges in electrons (e) of atoms within  $I3_{(4,1)}$ ,  $TS3P_{(4,1)vic}$  and  $P_{(4,1)vic}$  in the doublet state.

|                                      | $I3_{(4,1)}$                                                                      | $TS3P_{(4,1)vic}$                                                                 | $P_{(4,1)vic}$                                                                    |
|--------------------------------------|-----------------------------------------------------------------------------------|-----------------------------------------------------------------------------------|-----------------------------------------------------------------------------------|
|                                      |  |  |  |
| <b>Ta1</b>                           | 0.61512                                                                           | 0.60802                                                                           | 0.68992                                                                           |
| <b>Dif. *I3</b>                      |                                                                                   | -0.0071                                                                           | 0.0748                                                                            |
| <b>Dif. *TS3P<sub>(4,1)vic</sub></b> |                                                                                   |                                                                                   | 0.0819                                                                            |
| <b>Ta2</b>                           | 0.76117                                                                           | 0.85803                                                                           | 1.01663                                                                           |
| <b>Dif. *I3</b>                      |                                                                                   | 0.09686                                                                           | 0.25546                                                                           |
| <b>Dif. *TS3P<sub>(4,1)vic</sub></b> |                                                                                   |                                                                                   | 0.1586                                                                            |
| <b>Ta3</b>                           | 0.67714                                                                           | 0.68491                                                                           | 0.69468                                                                           |
| <b>Dif. *I3</b>                      |                                                                                   | 0.00777                                                                           | 0.01754                                                                           |
| <b>Dif. *TS3P<sub>(4,1)vic</sub></b> |                                                                                   |                                                                                   | 0.00977                                                                           |
| <b>Ta4</b>                           | 0.05111                                                                           | 0.04651                                                                           | 0.1791                                                                            |
| <b>Dif. *I3</b>                      |                                                                                   | -0.0046                                                                           | 0.12799                                                                           |
| <b>Dif. *TS3P<sub>(4,1)vic</sub></b> |                                                                                   |                                                                                   | 0.13259                                                                           |
| <b>N1</b>                            | -0.57428                                                                          | -0.64387                                                                          | -0.78987                                                                          |
| <b>Dif. *I3</b>                      |                                                                                   | -0.06959                                                                          | -0.21559                                                                          |
| <b>Dif. *TS3P<sub>(4,1)vic</sub></b> |                                                                                   |                                                                                   | -0.146                                                                            |
| <b>N2</b>                            | -0.53027                                                                          | -0.5536                                                                           | -0.79046                                                                          |

**Table S5.** Calculated energies of the cluster adsorbate complex  $[\text{Ta}_4(\text{N}_2)_2]^+$  in the doublet state along the activation pathway of the second  $\text{N}_2$  molecule depending on the adsorption site (Ta2, Ta3 or Ta4) to the  $[\text{Ta}_4\text{NN}]^+$  cluster complex.

|                                                          | <b>N<sub>2</sub> adsorption on Ta3</b> |                    | <b>N<sub>2</sub> adsorption on Ta4</b> |                    | <b>N<sub>2</sub> adsorption on Ta2</b> |                    |
|----------------------------------------------------------|----------------------------------------|--------------------|----------------------------------------|--------------------|----------------------------------------|--------------------|
|                                                          | <b>energy E / Ha</b>                   | <b>ΔE / kJ/mol</b> | <b>energy E / Ha</b>                   | <b>ΔE / kJ/mol</b> | <b>energy E / Ha</b>                   | <b>ΔE / kJ/mol</b> |
| <b><math>[\text{Ta}_4\text{NN}]^+, \text{N}_2</math></b> | -446.67025                             | 0                  | -446.67025                             | 0                  | -446.67025                             | 0                  |
| <b>I1<sub>(4,2)</sub></b>                                | -446.68723                             | -45                | -446.68591                             | -41                | -446.69202                             | -57                |
| <b>TS12<sub>(4,2)</sub></b>                              | -446.68534                             | -40                | -446.67966                             | -25                | -446.68012                             | -26                |
| <b>I2<sub>(4,2)</sub></b>                                | -446.69788                             | -73                | -446.70842                             | -100               | -446.68996                             | -52                |
| <b>TS23<sub>(4,2)</sub></b>                              | -446.67392                             | -10                | -446.68283                             | -33                | -446.64057                             | 78                 |
| <b>I3<sub>(4,2)</sub></b>                                | -446.72388                             | -141               | -446.73011                             | -157               | -446.69561                             | -67                |
| <b>TS3P<sub>(4,2)</sub></b>                              | -446.70106                             | -81                | -446.71585                             | -120               |                                        |                    |
| <b>P<sub>(4,2)</sub></b>                                 | -446.80153                             | -345               | -446.81452                             | -379               |                                        |                    |



**Table S6.** Calculated distances in Å of atoms within  $[\text{Ta}_4\text{NN}]^+$  ( $P_{vic(4,1)}$ ),  $\text{N}_2$  and  $[\text{Ta}_4(\text{N}_2)_2]^+$  in the doublet state along the activation pathway of the second  $\text{N}_2$  molecule on a  $[\text{Ta}_4\text{NN}]^+$  cluster complex at the adsorption site Ta3.

|                | $P_{vic(4,1)}$                                                                    | $\text{N}_2$                                                                      | $I1_{(4,2)}$                                                                      | $TS12_{(4,2)}$                                                                     | $I2_{(4,2)}$                                                                        | $TS23_{(4,2)}$                                                                      | $I3_{(4,2)}$                                                                        | $TS3P_{(4,2)}$                                                                      | $P_{(4,2)}$                                                                         |
|----------------|-----------------------------------------------------------------------------------|-----------------------------------------------------------------------------------|-----------------------------------------------------------------------------------|------------------------------------------------------------------------------------|-------------------------------------------------------------------------------------|-------------------------------------------------------------------------------------|-------------------------------------------------------------------------------------|-------------------------------------------------------------------------------------|-------------------------------------------------------------------------------------|
|                | 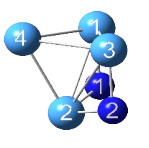 |  |  |  |  |  |  |  |  |
| <b>Ta1-Ta2</b> | 2.80981                                                                           |                                                                                   | 2.82055                                                                           | 2.81846                                                                            | 2.81562                                                                             | 2.79044                                                                             | 2.84153                                                                             | 2.83419                                                                             | 2.86942                                                                             |
| <b>Ta2-Ta3</b> | 2.80852                                                                           |                                                                                   | 2.81321                                                                           | 2.8097                                                                             | 2.83041                                                                             | 2.77281                                                                             | 2.7486                                                                              | 2.74203                                                                             | 2.86981                                                                             |
| <b>Ta3-Ta4</b> | 2.58246                                                                           |                                                                                   | 2.58503                                                                           | 2.57503                                                                            | 2.62351                                                                             | 2.72479                                                                             | 2.61416                                                                             | 2.6479                                                                              | 2.86977                                                                             |
| <b>Ta1-Ta4</b> | 2.57679                                                                           |                                                                                   | 2.56888                                                                           | 2.55941                                                                            | 2.61602                                                                             | 2.61317                                                                             | 2.9945                                                                              | 2.9591                                                                              | 2.86938                                                                             |
| <b>Ta2-Ta4</b> | 2.61516                                                                           |                                                                                   | 2.63087                                                                           | 2.62885                                                                            | 2.66096                                                                             | 2.79316                                                                             | 2.7182                                                                              | 2.75419                                                                             | 2.75944                                                                             |
| <b>Ta1-Ta3</b> | 2.69019                                                                           |                                                                                   | 2.71185                                                                           | 2.72558                                                                            | 2.73453                                                                             | 2.66141                                                                             | 2.65038                                                                             | 2.6742                                                                              | 2.75968                                                                             |
| <b>Ta1-N1</b>  | 1.83777                                                                           |                                                                                   | 1.83769                                                                           | 1.83437                                                                            | 1.83017                                                                             | 1.81963                                                                             | 1.86045                                                                             | 1.86293                                                                             | 1.87286                                                                             |
| <b>Ta1-N3</b>  |                                                                                   |                                                                                   |                                                                                   |                                                                                    |                                                                                     |                                                                                     | 2.14574                                                                             | 2.31351                                                                             |                                                                                     |
| <b>Ta1-N4</b>  |                                                                                   |                                                                                   |                                                                                   |                                                                                    |                                                                                     |                                                                                     | 1.98228                                                                             | 1.89827                                                                             | 1.87311                                                                             |
| <b>Ta2-N1</b>  | 1.89471                                                                           |                                                                                   | 1.89627                                                                           | 1.89915                                                                            | 1.90254                                                                             | 1.92068                                                                             | 1.90306                                                                             | 1.89545                                                                             | 1.87305                                                                             |
| <b>Ta2-N2</b>  | 1.89543                                                                           |                                                                                   | 1.88368                                                                           | 1.87654                                                                            | 1.88278                                                                             | 1.837                                                                               | 1.8778                                                                              | 1.87783                                                                             | 1.87285                                                                             |
| <b>Ta3-N2</b>  | 1.83664                                                                           |                                                                                   | 1.85651                                                                           | 1.86706                                                                            | 1.85636                                                                             | 1.92233                                                                             | 1.87172                                                                             | 1.87342                                                                             | 1.87306                                                                             |
| <b>Ta3-N3</b>  |                                                                                   |                                                                                   | 2.30132                                                                           | 2.15797                                                                            | 2.06218                                                                             | 2.00033                                                                             | 2.1264                                                                              | 2.10443                                                                             | 1.87283                                                                             |
| <b>Ta4-N3</b>  |                                                                                   |                                                                                   |                                                                                   |                                                                                    | 2.13317                                                                             | 2.1527                                                                              | 2.0368                                                                              | 1.88939                                                                             | 1.87309                                                                             |
| <b>Ta4-N4</b>  |                                                                                   |                                                                                   |                                                                                   | 3.37324                                                                            | 2.24011                                                                             | 1.96456                                                                             | 1.98694                                                                             | 2.02749                                                                             | 1.87284                                                                             |
| <b>N1-N2</b>   | 2.97767                                                                           |                                                                                   | 2.98932                                                                           | 2.98721                                                                            | 2.99665                                                                             | 3.06684                                                                             | 3.1244                                                                              | 3.10173                                                                             | 3.08235                                                                             |
| <b>N3-N4</b>   |                                                                                   | 1.08948                                                                           | 1.09618                                                                           | 1.11553                                                                            | 1.17958                                                                             | 1.26022                                                                             | 1.44534                                                                             | 1.86585                                                                             | 3.08214                                                                             |

**Table S7.** Calculated distances in Å of atoms within  $[\text{Ta}_4\text{NN}]^+$  ( $P_{vic(4,1)}$ ),  $\text{N}_2$  and  $[\text{Ta}_4(\text{N}_2)_2]^+$  in the doublet state along the activation pathway of the second  $\text{N}_2$  molecule on a  $[\text{Ta}_4\text{NN}]^+$  cluster complex at the adsorption site Ta4.

|                | $P_{vic(4,1)}$                                                                    | $\text{N}_2$                                                                      | $\text{I1}_{(4,2)}$                                                               | $\text{TS12}_{(4,2)}$                                                             | $\text{I2}_{(4,2)}$                                                                 | $\text{TS23}_{(4,2)}$                                                               | $\text{I3}_{(4,2)}$                                                                 | $\text{TS3P}_{(4,2)}$                                                               | $\text{P}_{(4,2)}$                                                                  |
|----------------|-----------------------------------------------------------------------------------|-----------------------------------------------------------------------------------|-----------------------------------------------------------------------------------|-----------------------------------------------------------------------------------|-------------------------------------------------------------------------------------|-------------------------------------------------------------------------------------|-------------------------------------------------------------------------------------|-------------------------------------------------------------------------------------|-------------------------------------------------------------------------------------|
|                |  |  |  |  |  |  |  |  |  |
| <b>Ta1-Ta2</b> | 2.80981                                                                           |                                                                                   | 2.83727                                                                           | 2.81923                                                                           | 2.84027                                                                             | 2.79306                                                                             | 2.82791                                                                             | 2.83734                                                                             | 2.89667                                                                             |
| <b>Ta2-Ta3</b> | 2.80852                                                                           |                                                                                   | 2.83709                                                                           | 2.81664                                                                           | 2.81509                                                                             | 2.77074                                                                             | 2.82787                                                                             | 2.81818                                                                             | 2.89051                                                                             |
| <b>Ta3-Ta4</b> | 2.58246                                                                           |                                                                                   | 2.58158                                                                           | 2.58516                                                                           | 2.65604                                                                             | 2.66614                                                                             | 2.61228                                                                             | 2.62146                                                                             | 2.80618                                                                             |
| <b>Ta1-Ta4</b> | 2.57679                                                                           |                                                                                   | 2.58141                                                                           | 2.5747                                                                            | 2.60394                                                                             | 2.57583                                                                             | 2.61193                                                                             | 2.67172                                                                             | 2.73099                                                                             |
| <b>Ta2-Ta4</b> | 2.61516                                                                           |                                                                                   | 2.72586                                                                           | 2.69287                                                                           | 2.68509                                                                             | 2.71478                                                                             | 2.6901                                                                              | 2.7219                                                                              | 2.73246                                                                             |
| <b>Ta1-Ta3</b> | 2.69019                                                                           |                                                                                   | 2.67366                                                                           | 2.68907                                                                           | 2.72829                                                                             | 2.73086                                                                             | 3.13204                                                                             | 3.03091                                                                             | 2.88981                                                                             |
| <b>Ta1-N1</b>  | 1.83777                                                                           |                                                                                   | 1.84822                                                                           | 1.84722                                                                           | 1.83673                                                                             | 1.821                                                                               | 1.86045                                                                             | 1.87169                                                                             | 1.87684                                                                             |
| <b>Ta1-N3</b>  |                                                                                   |                                                                                   |                                                                                   |                                                                                   |                                                                                     |                                                                                     | 2.00934                                                                             | 2.26048                                                                             |                                                                                     |
| <b>Ta1-N4</b>  |                                                                                   |                                                                                   |                                                                                   |                                                                                   |                                                                                     |                                                                                     | 2.16871                                                                             | 1.91141                                                                             | 1.85197                                                                             |
| <b>Ta2-N1</b>  | 1.89471                                                                           |                                                                                   | 1.88124                                                                           | 1.88215                                                                           | 1.8974                                                                              | 1.91623                                                                             | 1.88128                                                                             | 1.87141                                                                             | 1.87634                                                                             |
| <b>Ta2-N2</b>  | 1.89543                                                                           |                                                                                   | 1.88112                                                                           | 1.90161                                                                           | 1.86633                                                                             | 1.86                                                                                | 1.88118                                                                             | 1.86907                                                                             | 1.85192                                                                             |
| <b>Ta3-N2</b>  | 1.83664                                                                           |                                                                                   | 1.84818                                                                           | 1.83024                                                                           | 1.87476                                                                             | 1.89818                                                                             | 1.86052                                                                             | 1.87643                                                                             | 1.90732                                                                             |
| <b>Ta3-N3</b>  |                                                                                   |                                                                                   |                                                                                   | 2.78782                                                                           | 2.13583                                                                             | 2.16181                                                                             | 2.16863                                                                             | 2.17606                                                                             | 1.93905                                                                             |
| <b>Ta3-N4</b>  |                                                                                   |                                                                                   |                                                                                   |                                                                                   | 2.13585                                                                             | 2.18539                                                                             | 2.00921                                                                             | 1.9844                                                                              | 1.90715                                                                             |
| <b>Ta4-N3</b>  |                                                                                   |                                                                                   | 2.28513                                                                           | 2.14424                                                                           | 2.01852                                                                             | 1.94927                                                                             | 1.94453                                                                             | 1.85692                                                                             | 1.82058                                                                             |
| <b>N1-N2</b>   | 2.97767                                                                           |                                                                                   | 3.0311                                                                            | 3.02961                                                                           | 3.00888                                                                             | 2.98675                                                                             | 3.04954                                                                             | 3.01691                                                                             | 2.97204                                                                             |
| <b>N3-N4</b>   |                                                                                   | 1.08948                                                                           | 1.09805                                                                           | 1.1171                                                                            | 1.19908                                                                             | 1.22114                                                                             | 1.45082                                                                             | 1.88124                                                                             | 3.22509                                                                             |

**Table S8.** Calculated distances in Å of atoms within  $[\text{Ta}_4\text{NN}]^+$  ( $P_{vic(4,1)}$ ),  $\text{N}_2$  and  $[\text{Ta}_4(\text{N}_2)_2]^+$  in the doublet state along the activation pathway of the second  $\text{N}_2$  molecule on a  $[\text{Ta}_4\text{NN}]^+$  cluster complex at the adsorption site Ta2.

|                | $P_{vic(4,1)}$                                                                    | $\text{N}_2$                                                                      | $\text{I1}_{(4,2)}$                                                               | $\text{TS12}_{(4,2)}$                                                              | $\text{I2}_{(4,2)}$                                                                 | $\text{TS23}_{(4,2)}$                                                               | $\text{I3}_{(4,2)}$                                                                 |
|----------------|-----------------------------------------------------------------------------------|-----------------------------------------------------------------------------------|-----------------------------------------------------------------------------------|------------------------------------------------------------------------------------|-------------------------------------------------------------------------------------|-------------------------------------------------------------------------------------|-------------------------------------------------------------------------------------|
|                |  |  |  |  |  |  |  |
| <b>Ta1-Ta2</b> | 2.80981                                                                           |                                                                                   | 2.81513                                                                           | 2.78882                                                                            | 2.79645                                                                             | 2.79156                                                                             | 2.80208                                                                             |
| <b>Ta2-Ta3</b> | 2.80852                                                                           |                                                                                   | 2.81529                                                                           | 2.78883                                                                            | 2.79699                                                                             | 2.77467                                                                             | 2.6197                                                                              |
| <b>Ta3-Ta4</b> | 2.58246                                                                           |                                                                                   | 2.58552                                                                           | 2.58659                                                                            | 2.63276                                                                             | 2.52906                                                                             | 2.95895                                                                             |
| <b>Ta1-Ta4</b> | 2.57679                                                                           |                                                                                   | 2.58532                                                                           | 2.58658                                                                            | 2.63207                                                                             | 2.64573                                                                             | 2.582                                                                               |
| <b>Ta2-Ta4</b> | 2.61516                                                                           |                                                                                   | 2.62512                                                                           | 2.62782                                                                            | 2.68194                                                                             | 2.65112                                                                             | 3.06341                                                                             |
| <b>Ta1-Ta3</b> | 2.69019                                                                           |                                                                                   | 2.70673                                                                           | 2.70501                                                                            | 2.68166                                                                             | 2.7193                                                                              | 2.71683                                                                             |
| <b>Ta1-N1</b>  | 1.83777                                                                           |                                                                                   | 1.83311                                                                           | 1.83438                                                                            | 1.84518                                                                             | 1.8294                                                                              | 1.861                                                                               |
| <b>Ta2-N1</b>  | 1.89471                                                                           |                                                                                   | 1.90516                                                                           | 1.91897                                                                            | 1.9048                                                                              | 1.91194                                                                             | 1.88476                                                                             |
| <b>Ta2-N2</b>  | 1.89543                                                                           |                                                                                   | 1.90542                                                                           | 1.91897                                                                            | 1.90526                                                                             | 1.89714                                                                             | 1.9482                                                                              |
| <b>Ta2-N3</b>  |                                                                                   |                                                                                   | 2.36296                                                                           | 2.14761                                                                            | 2.07339                                                                             | 2.19879                                                                             | 2.01995                                                                             |
| <b>Ta2-N4</b>  |                                                                                   |                                                                                   |                                                                                   |                                                                                    |                                                                                     |                                                                                     | 2.39541                                                                             |
| <b>Ta3-N2</b>  | 1.83664                                                                           |                                                                                   | 1.83295                                                                           | 1.83437                                                                            | 1.84477                                                                             | 1.83515                                                                             | 1.83541                                                                             |
| <b>Ta3-N4</b>  |                                                                                   |                                                                                   |                                                                                   |                                                                                    |                                                                                     |                                                                                     | 1.97752                                                                             |
| <b>Ta4-N3</b>  |                                                                                   |                                                                                   |                                                                                   | 2.60943                                                                            | 2.13529                                                                             | 2.13624                                                                             | 1.97593                                                                             |
| <b>Ta4-N4</b>  |                                                                                   |                                                                                   |                                                                                   |                                                                                    | 2.2617                                                                              | 2.25311                                                                             | 2.01989                                                                             |
| <b>N1-N2</b>   | 2.97767                                                                           |                                                                                   | 3.01154                                                                           | 3.15922                                                                            | 3.19045                                                                             | 2.8922                                                                              | 3.14599                                                                             |
| <b>N3-N4</b>   |                                                                                   | 1.08948                                                                           | 1.09143                                                                           | 1.12419                                                                            | 1.18514                                                                             | 1.17595                                                                             | 1.43254                                                                             |

**Table S9.** Calculated distances in Å of atoms within  $[\text{Ta}_4\text{N}]\text{N}^+$  ( $P_{(4,2)}$ ),  $\text{N}_2$  and  $[\text{Ta}_4(\text{N}_2)_3]^+$  in the doublet state along the activation pathway of the third  $\text{N}_2$  molecule on a  $[\text{Ta}_4\text{N}]\text{N}^+$  cluster complex.

|                | $P_{(4,2)}$                                                                       | $\text{N}_2$                                                                      | $I1_{(4,3)}$                                                                      | $TS12_{(4,3)}$                                                                    | $I2_{(4,3)}$                                                                       | $TS23_{(4,3)}$                                                                      | $I3_{(4,3)}$                                                                        | $TS3P_{(4,3)}$                                                                      | $P_{(4,3)}$                                                                         |
|----------------|-----------------------------------------------------------------------------------|-----------------------------------------------------------------------------------|-----------------------------------------------------------------------------------|-----------------------------------------------------------------------------------|------------------------------------------------------------------------------------|-------------------------------------------------------------------------------------|-------------------------------------------------------------------------------------|-------------------------------------------------------------------------------------|-------------------------------------------------------------------------------------|
|                | 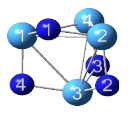 |  |  |  |  |  |  |  |  |
| <b>Ta1-Ta2</b> | 2.89667                                                                           |                                                                                   | 2.90994                                                                           | 2.87769                                                                           | 2.93005                                                                            | 2.85026                                                                             | 2.72582                                                                             | 2.76575                                                                             | 3.0643                                                                              |
| <b>Ta2-Ta3</b> | 2.89051                                                                           |                                                                                   | 2.90311                                                                           | 2.92722                                                                           | 2.98695                                                                            | 3.01501                                                                             | 2.88929                                                                             | 2.86835                                                                             | 3.06265                                                                             |
| <b>Ta3-Ta4</b> | 2.80618                                                                           |                                                                                   | 2.8047                                                                            | 2.82866                                                                           | 2.83734                                                                            | 2.94419                                                                             | 2.54255                                                                             | 2.57789                                                                             | 3.06413                                                                             |
| <b>Ta1-Ta4</b> | 2.73099                                                                           |                                                                                   | 2.72676                                                                           | 2.71213                                                                           | 2.75695                                                                            | 2.67934                                                                             | 2.85667                                                                             | 2.9236                                                                              | 3.06575                                                                             |
| <b>Ta2-Ta4</b> | 2.73246                                                                           |                                                                                   | 2.75834                                                                           | 2.76559                                                                           | 2.8308                                                                             | 2.75024                                                                             | 2.93891                                                                             | 2.89893                                                                             | 3.06486                                                                             |
| <b>Ta1-Ta3</b> | 2.88981                                                                           |                                                                                   | 2.88935                                                                           | 2.83791                                                                           | 2.85544                                                                            | 3.05579                                                                             | 3.37458                                                                             | 3.38825                                                                             | 3.06333                                                                             |
| <b>Ta1-N1</b>  | 1.87684                                                                           |                                                                                   | 1.90147                                                                           | 1.906                                                                             | 1.90697                                                                            | 1.90828                                                                             | 1.83387                                                                             | 1.83147                                                                             | 1.88945                                                                             |
| <b>Ta1-N4</b>  | 1.85197                                                                           |                                                                                   | 1.85296                                                                           | 1.88849                                                                           | 1.87502                                                                            | 1.88057                                                                             | 1.97257                                                                             | 1.9503                                                                              | 1.8892                                                                              |
| <b>Ta1-N5</b>  |                                                                                   |                                                                                   | 2.35714                                                                           | 2.18602                                                                           | 2.0513                                                                             | 2.18602                                                                             | 1.91426                                                                             | 1.89104                                                                             | 1.88959                                                                             |
| <b>Ta2-N1</b>  | 1.87634                                                                           |                                                                                   | 1.86135                                                                           | 1.86241                                                                           | 1.85264                                                                            | 1.85229                                                                             | 1.95201                                                                             | 1.96964                                                                             | 1.88959                                                                             |
| <b>Ta2-N2</b>  | 1.85192                                                                           |                                                                                   | 1.85731                                                                           | 1.85202                                                                           | 1.84419                                                                            | 1.85237                                                                             | 1.8486                                                                              | 1.85811                                                                             | 1.88944                                                                             |
| <b>Ta2-N5</b>  |                                                                                   |                                                                                   |                                                                                   |                                                                                   |                                                                                    |                                                                                     | 2.34129                                                                             | 2.37533                                                                             |                                                                                     |
| <b>Ta2-N6</b>  |                                                                                   |                                                                                   |                                                                                   |                                                                                   |                                                                                    |                                                                                     | 2.1297                                                                              | 2.04184                                                                             | 1.88967                                                                             |
| <b>Ta3-N2</b>  | 1.90732                                                                           |                                                                                   | 1.90617                                                                           | 1.9099                                                                            | 1.91809                                                                            | 1.89812                                                                             | 1.92122                                                                             | 1.91462                                                                             | 1.88953                                                                             |
| <b>Ta3-N3</b>  | 1.93905                                                                           |                                                                                   | 1.94295                                                                           | 1.94474                                                                           | 1.91172                                                                            | 1.87877                                                                             | 1.86091                                                                             | 1.85886                                                                             | 1.8894                                                                              |
| <b>Ta3-N4</b>  | 1.90715                                                                           |                                                                                   | 1.90975                                                                           | 1.89442                                                                           | 1.90933                                                                            | 1.88815                                                                             | 2.08733                                                                             | 2.04167                                                                             | 1.8898                                                                              |
| <b>Ta4-N3</b>  | 1.82058                                                                           |                                                                                   | 1.81801                                                                           | 1.81703                                                                           | 1.85547                                                                            | 1.88415                                                                             | 1.91334                                                                             | 1.91923                                                                             | 1.88949                                                                             |
| <b>Ta4-N5</b>  |                                                                                   |                                                                                   |                                                                                   |                                                                                   | 2.1355                                                                             | 2.20318                                                                             | 2.16854                                                                             | 2.13948                                                                             | 1.88935                                                                             |
| <b>Ta4-N6</b>  |                                                                                   |                                                                                   |                                                                                   |                                                                                   | 2.12976                                                                            | 2.20298                                                                             | 2.02923                                                                             | 1.94534                                                                             | 1.88927                                                                             |
| <b>N1-N2</b>   | 2.97204                                                                           |                                                                                   | 2.98615                                                                           | 2.99346                                                                           | 3.00743                                                                            | 2.7984                                                                              | 2.89833                                                                             | 2.94792                                                                             | 3.09657                                                                             |
| <b>N3-N4</b>   | 3.22509                                                                           |                                                                                   | 3.22173                                                                           | 3.23665                                                                           | 3.21198                                                                            | 3.09707                                                                             | 2.79033                                                                             | 2.79851                                                                             | 3.0969                                                                              |
| <b>N5-N6</b>   |                                                                                   | 1.08948                                                                           | 1.09095                                                                           | 1.11783                                                                           | 1.20694                                                                            | 1.2035                                                                              | 1.38899                                                                             | 1.86645                                                                             | 3.09568                                                                             |

**Table S10.** Calculated energies of the cluster adsorbate complex  $[\text{Ta}_4(\text{N}_2)_3]^+$  in the doublet state along the activation pathway of the third  $\text{N}_2$  molecule to the  $[\text{Ta}_4\text{NNNN}]^+$  cluster complex.

|                                          | energy E / Ha | $\Delta E$ in kJ/mol |
|------------------------------------------|---------------|----------------------|
| $[\text{Ta}_4\text{NNNN}]^+, \text{N}_2$ | -556.2608     | 0                    |
| <b>I1</b> <sub>(4,3)</sub>               | -556.28521    | -64                  |
| <b>TS12</b> <sub>(4,3)</sub>             | -556.26904    | -22                  |
| <b>I2</b> <sub>(4,3)</sub>               | -556.29382    | -87                  |
| <b>TS23</b> <sub>(4,3)</sub>             | -556.23984    | 55                   |
| <b>I3</b> <sub>(4,3)</sub>               | -556.28957    | -76                  |
| <b>TS3P</b> <sub>(4,3)</sub>             | -556.25859    | 6                    |
| <b>P</b> <sub>(4,3)</sub>                | -556.35682    | -252                 |

**Table S11.** Calculated energies and vibrational frequencies of model systems (scaling factor: 0.9376).

|                                                | $Ta_4(N_2)_3^+$ | $[Ta_4(N_2)_4]^+$  |                    |                    |                    | $[Ta_4(N_2)_5]^+$       |                         |                         |                         |                         |                         |
|------------------------------------------------|-----------------|--------------------|--------------------|--------------------|--------------------|-------------------------|-------------------------|-------------------------|-------------------------|-------------------------|-------------------------|
|                                                | $I_{2(4,3)}$    | $(4,4)_{400}^+Ta1$ | $(4,4)_{401}^+Ta2$ | $(4,4)_{402}^+Ta4$ | $(4,4)_{403}^+Ta3$ | $(4,5)_{400}^+Ta1^*Ta2$ | $(4,5)_{402}^+Ta1^*Ta3$ | $(4,5)_{401}^+Ta1^*Ta4$ | $(4,5)_{420}^+Ta4^*Ta3$ | $(4,5)_{411}^+Ta2^*Ta3$ | $(4,5)_{410}^+Ta2^*Ta4$ |
|                                                |                 |                    |                    |                    |                    |                         |                         |                         |                         |                         |                         |
| energy E / Ha                                  | -556.29382      | -665.76333         | -665.76489         | -665.76475         | -665.76465         | -775.2347               | -775.23182              | -775.23465              | -775.23487              | -775.23609              | -775.23499              |
| energy E / kJ/mol                              |                 | -1747961.382       | -1747965.478       | -1747965.11        | -1747964.848       | -2035378.424            | -2035370.863            | -2035378.293            | -2035378.871            | -2035382.074            | -2035379.186            |
| $\nu_{(N5N6)} / \text{cm}^{-1}$                | 1516.31         | 1473.52            | 1517.75            | 1490.68            | 1475.3             | 1474.1                  | 1458.64                 | 1423.29                 | 1414.9                  | 1478.16                 | 1475.63                 |
| $\nu_{(N5N6)_{\text{scal}}} / \text{cm}^{-1}$  | 1422            | 1382               | 1423               | 1398               | 1383               | 1382                    | 1368                    | 1334                    | 1327                    | 1386                    | 1384                    |
| $\nu_{(N7N8)} / \text{cm}^{-1}$                |                 | 2481.53            | 2461.79            | 2403.02            | 2492.59            | 2481.4                  | 2480.81                 | 2476.65                 | 2406.97                 | 2415                    | 2476.27                 |
| $\nu_{(N7N8)_{\text{scal}}} / \text{cm}^{-1}$  |                 | 2326.615362        | 2308.107672        | 2253.006511        | 2336.984918        | 2326.493477             | 2325.940309             | 2322.040006             | 2256.709924             | 2264.238634             | 2321.683728             |
| $\nu_{(N9N10)} / \text{cm}^{-1}$               |                 |                    |                    |                    |                    | 2423.01                 | 2491.86                 | 2405.77                 | 2488.26                 | 2492.84                 | 2399.66                 |
| $\nu_{(N9N10)_{\text{scal}}} / \text{cm}^{-1}$ |                 |                    |                    |                    |                    | 2271.748594             | 2336.30049              | 2255.584836             | 2332.925228             | 2337.219312             | 2249.856266             |

**Table S12.** Calculated distances in Å of atoms within model systems in the doublet state.

|                | [Ta <sub>2</sub> (N <sub>2</sub> ) <sub>2</sub> ] <sup>+</sup> | [Ta <sub>4</sub> (N <sub>2</sub> ) <sub>4</sub> ] <sup>+</sup> |                           |                           |                           | [Ta <sub>6</sub> (N <sub>2</sub> ) <sub>6</sub> ] <sup>+</sup> |                                |                                |                                |                                |                                |
|----------------|----------------------------------------------------------------|----------------------------------------------------------------|---------------------------|---------------------------|---------------------------|----------------------------------------------------------------|--------------------------------|--------------------------------|--------------------------------|--------------------------------|--------------------------------|
|                | I <sub>2</sub> (4,3)                                           | (4,4) <sub>400</sub> *Ta1                                      | (4,4) <sub>401</sub> *Ta2 | (4,4) <sub>402</sub> *Ta4 | (4,4) <sub>403</sub> *Ta3 | (4,5) <sub>400</sub> *Ta1 *Ta2                                 | (4,5) <sub>402</sub> *Ta1 *Ta3 | (4,5) <sub>401</sub> *Ta1 *Ta4 | (4,5) <sub>420</sub> *Ta4 *Ta3 | (4,5) <sub>411</sub> *Ta2 *Ta3 | (4,5) <sub>410</sub> *Ta2 *Ta4 |
| <b>Ta1-Ta2</b> | 2.93005                                                        | 2.96352                                                        | 2.9226                    | 2.93769                   | 2.91401                   | 2.94426                                                        | 2.92393                        | 2.97832                        | 2.92776                        | 2.88943                        | 2.93332                        |
| <b>Ta2-Ta3</b> | 2.98695                                                        | 2.9486                                                         | 2.976                     | 2.97279                   | 3.02814                   | 2.92539                                                        | 2.98623                        | 2.93948                        | 3.02048                        | 3.00167                        | 2.96424                        |
| <b>Ta3-Ta4</b> | 2.83734                                                        | 2.80566                                                        | 2.84709                   | 2.87449                   | 2.88121                   | 2.83583                                                        | 2.87097                        | 2.83913                        | 2.91576                        | 2.90965                        | 2.88324                        |
| <b>Ta1-Ta4</b> | 2.75695                                                        | 2.80731                                                        | 2.77777                   | 2.81097                   | 2.73511                   | 2.82968                                                        | 2.77981                        | 2.83961                        | 2.78023                        | 2.76349                        | 2.8256                         |
| <b>Ta2-Ta4</b> | 2.8308                                                         | 2.81436                                                        | 2.83143                   | 2.85005                   | 2.82047                   | 2.80704                                                        | 2.78142                        | 2.81862                        | 2.82894                        | 2.81037                        | 2.85432                        |
| <b>Ta1-Ta3</b> | 2.85544                                                        | 2.89859                                                        | 2.86735                   | 2.84297                   | 2.89649                   | 2.93278                                                        | 2.95135                        | 2.92159                        | 2.9092                         | 2.93339                        | 2.85337                        |
| <b>Ta1-N1</b>  | 1.90697                                                        | 1.91016                                                        | 1.9046                    | 1.90687                   | 1.91042                   | 1.90379                                                        | 1.91529                        | 1.90849                        | 1.91203                        | 1.90209                        | 1.90545                        |
| <b>Ta1-N4</b>  | 1.87502                                                        | 1.87323                                                        | 1.87602                   | 1.87158                   | 1.88034                   | 1.87555                                                        | 1.87698                        | 1.87425                        | 1.88098                        | 1.88406                        | 1.87392                        |
| <b>Ta1-N5</b>  | 2.0513                                                         | 2.03829                                                        | 2.05057                   | 2.05122                   | 2.04029                   | 2.0344                                                         | 2.031                          | 2.03136                        | 2.02038                        | 2.03581                        | 2.04593                        |
| <b>Ta1-N7</b>  |                                                                | 2.3757                                                         |                           |                           |                           | 2.37482                                                        | 2.39362                        | 2.36477                        |                                |                                |                                |
| <b>Ta2-N1</b>  | 1.85264                                                        | 1.85783                                                        | 1.86394                   | 1.85562                   | 1.85238                   | 1.87465                                                        | 1.85735                        | 1.86201                        | 1.85336                        | 1.87002                        | 1.8647                         |
| <b>Ta2-N2</b>  | 1.84419                                                        | 1.84845                                                        | 1.8562                    | 1.84425                   | 1.8521                    | 1.86459                                                        | 1.86124                        | 1.84785                        | 1.85194                        | 1.87132                        | 1.8522                         |
| <b>Ta2-N7</b>  |                                                                |                                                                | 2.37603                   |                           |                           |                                                                |                                |                                |                                | 2.32757                        | 2.39398                        |
| <b>Ta2-N9</b>  |                                                                |                                                                |                           |                           |                           | 2.33544                                                        |                                |                                |                                |                                |                                |
| <b>Ta3-N2</b>  | 1.91809                                                        | 1.91638                                                        | 1.91333                   | 1.91986                   | 1.91584                   | 1.90728                                                        | 1.90737                        | 1.91846                        | 1.91658                        | 1.90478                        | 1.9186                         |
| <b>Ta3-N3</b>  | 1.91172                                                        | 1.91774                                                        | 1.91408                   | 1.91217                   | 1.90912                   | 1.91959                                                        | 1.91035                        | 1.91568                        | 1.9078                         | 1.91285                        | 1.91335                        |
| <b>Ta3-N4</b>  | 1.90933                                                        | 1.91615                                                        | 1.91261                   | 1.91253                   | 1.91061                   | 1.9165                                                         | 1.91806                        | 1.91141                        | 1.90751                        | 1.90943                        | 1.91301                        |
| <b>Ta3-N7</b>  |                                                                |                                                                |                           |                           | 2.38548                   |                                                                |                                |                                |                                |                                |                                |
| <b>Ta3-N9</b>  |                                                                |                                                                |                           |                           |                           |                                                                | 2.39766                        |                                | 2.38438                        | 2.3876                         |                                |
| <b>Ta4-N3</b>  | 1.85547                                                        | 1.8532                                                         | 1.85431                   | 1.85345                   | 1.86258                   | 1.85038                                                        | 1.86262                        | 1.8541                         | 1.86273                        | 1.85856                        | 1.85403                        |
| <b>Ta4-N5</b>  | 2.1355                                                         | 2.12958                                                        | 2.13941                   | 2.1306                    | 2.11912                   | 2.13757                                                        | 2.1166                         | 2.122                          | 2.10771                        | 2.12673                        | 2.13181                        |
| <b>Ta4-N6</b>  | 2.12976                                                        | 2.12091                                                        | 2.1243                    | 2.17063                   | 2.10878                   | 2.11489                                                        | 2.10592                        | 2.16231                        | 2.143                          | 2.10529                        | 2.16701                        |
| <b>Ta4-N7</b>  |                                                                |                                                                |                           | 2.2843                    |                           |                                                                |                                |                                | 2.28743                        |                                |                                |
| <b>Ta4-N9</b>  |                                                                |                                                                |                           |                           |                           |                                                                |                                | 2.28335                        |                                |                                | 2.28658                        |
| <b>N5-N6</b>   | 1.20694                                                        | 1.21471                                                        | 1.20768                   | 1.20584                   | 1.21869                   | 1.21592                                                        | 1.22442                        | 1.21875                        | 1.22772                        | 1.21933                        | 1.20793                        |
| <b>N7-N8</b>   |                                                                | 1.08882                                                        | 1.8956                    | 1.09306                   | 1.08829                   | 1.08882                                                        | 1.08881                        | 1.08908                        | 1.09308                        | 1.09223                        | 1.08903                        |
| <b>N9-N10</b>  |                                                                |                                                                |                           |                           |                           | 1.09173                                                        | 1.08817                        | 1.09311                        | 1.08834                        | 1.08818                        | 1.09319                        |

**Table S13.** Calculated NPA charges in electrons (e) of atoms within model systems in the doublet state.

|            | [Ta <sub>3</sub> (N <sub>2</sub> ) <sub>4</sub> ] <sup>+</sup> | [Ta <sub>4</sub> (N <sub>2</sub> ) <sub>4</sub> ] <sup>+</sup> |                           |                           |                           | [Ta <sub>4</sub> (N <sub>2</sub> ) <sub>5</sub> ] <sup>+</sup> |                               |                               |                               |                               |                               |
|------------|----------------------------------------------------------------|----------------------------------------------------------------|---------------------------|---------------------------|---------------------------|----------------------------------------------------------------|-------------------------------|-------------------------------|-------------------------------|-------------------------------|-------------------------------|
|            | I <sub>2(4,3)</sub>                                            | (4,4) <sub>400</sub> *Ta1                                      | (4,4) <sub>401</sub> *Ta2 | (4,4) <sub>402</sub> *Ta4 | (4,4) <sub>403</sub> *Ta3 | (4,5) <sub>400</sub> *Ta1*Ta2                                  | (4,5) <sub>402</sub> *Ta1*Ta3 | (4,5) <sub>401</sub> *Ta1*Ta4 | (4,5) <sub>420</sub> *Ta4*Ta3 | (4,5) <sub>411</sub> *Ta2*Ta3 | (4,5) <sub>410</sub> *Ta2*Ta4 |
|            |                                                                |                                                                |                           |                           |                           |                                                                |                               |                               |                               |                               |                               |
|            | npa                                                            | npa                                                            | npa                       | npa                       | npa                       | npa                                                            | npa                           | npa                           | npa                           | npa                           | npa                           |
| <b>Ta1</b> | 1.516                                                          | 1.444                                                          | 1.527                     | 1.532                     | 1.507                     | 1.458                                                          | 1.445                         | 1.468                         | 1.544                         | 1.534                         | 1.538                         |
| <b>Ta2</b> | 1.336                                                          | 1.321                                                          | 1.209                     | 1.34                      | 1.324                     | 1.182                                                          | 1.295                         | 1.328                         | 1.33                          | 1.19                          | 1.221                         |
| <b>Ta4</b> | 1.069                                                          | 1.096                                                          | 1.093                     | 0.963                     | 1.086                     | 1.133                                                          | 1.092                         | 0.978                         | 0.999                         | 1.123                         | 0.986                         |
| <b>Ta3</b> | 1.757                                                          | 1.721                                                          | 1.757                     | 1.735                     | 1.677                     | 1.738                                                          | 1.668                         | 1.726                         | 1.676                         | 1.686                         | 1.732                         |
| <b>N4</b>  | -1.022                                                         | -1.02                                                          | -1.028                    | -1.017                    | -1.022                    | -1.027                                                         | -1.024                        | -1.017                        | -1.021                        | -1.031                        | -1.023                        |
| <b>N3</b>  | -1.003                                                         | -0.999                                                         | -1.007                    | -0.988                    | -1.001                    | -1.003                                                         | -0.998                        | -0.985                        | -0.988                        | -1.004                        | -0.991                        |
| <b>N2</b>  | -1.014                                                         | -1.015                                                         | -1.019                    | -1.013                    | -1.021                    | -1.021                                                         | -1.022                        | -1.016                        | -1.02                         | -1.026                        | -1.017                        |
| <b>N1</b>  | -0.988                                                         | -0.995                                                         | -0.996                    | -0.996                    | -0.991                    | -1.001                                                         | -0.994                        | -1.002                        | -0.999                        | -0.999                        | -1.002                        |
| <b>N5</b>  | -0.426                                                         | -0.435                                                         | -0.428                    | -0.433                    | -0.451                    | -0.438                                                         | -0.455                        | -0.455                        | -0.486                        | -0.454                        | -0.437                        |
| <b>N6</b>  | -0.224                                                         | -0.247                                                         | -0.23                     | -0.207                    | -0.251                    | -0.256                                                         | -0.267                        | -0.241                        | -0.257                        | -0.256                        | -0.218                        |
| <b>N7</b>  |                                                                | -0.105                                                         | -0.118                    | -0.123                    | -0.103                    | -0.102                                                         | -0.098                        | -0.101                        | -0.114                        | -0.125                        | -0.11                         |
| <b>N8</b>  |                                                                | 0.235                                                          | 0.242                     | 0.204                     | 0.244                     | 0.233                                                          | 0.222                         | 0.232                         | 0.196                         | 0.222                         | 0.24                          |
| <b>N9</b>  |                                                                |                                                                |                           |                           |                           | -0.121                                                         | -0.1                          | -0.114                        | -0.1                          | -0.103                        | -0.117                        |
| <b>N10</b> |                                                                |                                                                |                           |                           |                           | 0.225                                                          | 0.237                         | 0.199                         | 0.241                         | 0.244                         | 0.198                         |



**Table S14.** Total energies of the activation pathway of the first N<sub>2</sub> molecule in the doublet state from I2 to P<sub>vic</sub> by DFT with various functionals. These values are visualized in Fig. S8.

|              |               | I2 <sub>(4,1)</sub> | TS23 <sub>(4,1)</sub> | I3 <sub>(4,1)</sub> | TS3P <sub>vic(4,1)</sub> | P <sub>vic(4,1)</sub> |
|--------------|---------------|---------------------|-----------------------|---------------------|--------------------------|-----------------------|
| <b>B3LYP</b> | energy E / Ha | -337.320685         | -337.292027           | -337.332639         | -337.331014              | -337.448346           |
|              | ΔE / kJ/mol   | 0.000000            | 75.241579             | -31.385227          | -27.118789               | -335.173955           |
| <b>PBE</b>   | energy E / Ha | -337.345128         | -337.318768           | -337.356264         | -337.355091              | -337.459392           |
|              | ΔE / kJ/mol   | 0.000000            | 69.208180             | -29.237568          | -26.157857               | -300.000132           |
| <b>M06</b>   | energy E / Ha | -337.094349         | -337.067648           | -337.109171         | -337.104272              | -337.220527           |
|              | ΔE / kJ/mol   | 0.000000            | 70.103476             | -38.915161          | -26.052836               | -331.280339           |
| <b>TPSSh</b> | energy E / Ha | -337.266114         | -337.243832           | -337.285250         | -337.284140              | -337.391540           |
|              | ΔE / kJ/mol   | 0.000000            | 58.501391             | -50.241568          | -47.327263               | -329.305963           |
| <b>PBE0</b>  | energy E / Ha | -337.095144         | -337.072693           | -337.117157         | -337.113500              | -337.223969           |
|              | ΔE / kJ/mol   | 0.000000            | 58.945100             | -57.795132          | -48.193678               | -338.230038           |
| <b>riCC2</b> | energy E / Ha | -336.227918         | -336.213484           | -336.246759         |                          |                       |
|              | ΔE / kJ/mol   | 0.000000            | 37.896118             | -49.467877          |                          |                       |

**Table S15.** Calculated distances in Å of atoms within in the doublet state along the activation pathway of the first N<sub>2</sub> molecule from I<sub>2(4,1)</sub> to P<sub>vic(4,1)</sub>.

|                | B3LYP                                                                             |                                                                                   |                                                                                   |                                                                                   |                                                                                   | PBE                                                                               |                                                                                   |                                                                                     |                                                                                     |                                                                                     | M06                                                                                 |                                                                                     |                                                                                     |                                                                                     |                                                                                     |
|----------------|-----------------------------------------------------------------------------------|-----------------------------------------------------------------------------------|-----------------------------------------------------------------------------------|-----------------------------------------------------------------------------------|-----------------------------------------------------------------------------------|-----------------------------------------------------------------------------------|-----------------------------------------------------------------------------------|-------------------------------------------------------------------------------------|-------------------------------------------------------------------------------------|-------------------------------------------------------------------------------------|-------------------------------------------------------------------------------------|-------------------------------------------------------------------------------------|-------------------------------------------------------------------------------------|-------------------------------------------------------------------------------------|-------------------------------------------------------------------------------------|
|                | I <sub>2(4,1)</sub>                                                               | TS23 <sub>(4,1)</sub>                                                             | I <sub>3(4,1)</sub>                                                               | TS3P <sub>vic(4,1)</sub>                                                          | P <sub>vic(4,1)</sub>                                                             | I <sub>2(4,1)</sub>                                                               | TS23 <sub>(4,1)</sub>                                                             | I <sub>3(4,1)</sub>                                                                 | TS3P <sub>vic(4,1)</sub>                                                            | P <sub>vic(4,1)</sub>                                                               | I <sub>2(4,1)</sub>                                                                 | TS23 <sub>(4,1)</sub>                                                               | I <sub>3(4,1)</sub>                                                                 | TS3P <sub>vic(4,1)</sub>                                                            | P <sub>vic(4,1)</sub>                                                               |
|                |  |  |  |  |  |  |  |  |  |  |  |  |  |  |  |
| <b>Ta1-Ta2</b> | 2.65984                                                                           | 2.63563                                                                           | 2.97672                                                                           | 3.02459                                                                           | 2.84429                                                                           | 2.65862                                                                           | 2.59166                                                                           | 2.97877                                                                             | 3.01261                                                                             | 2.82649                                                                             | 2.65692                                                                             | 2.6092                                                                              | 2.95716                                                                             | 2.99994                                                                             | 2.82557                                                                             |
| <b>Ta2-Ta3</b> | 2.59167                                                                           | 2.45614                                                                           | 2.90466                                                                           | 2.85321                                                                           | 2.84454                                                                           | 2.5881                                                                            | 2.44783                                                                           | 2.88381                                                                             | 2.83954                                                                             | 2.82677                                                                             | 2.59247                                                                             | 2.45758                                                                             | 2.8774                                                                              | 2.81735                                                                             | 2.82581                                                                             |
| <b>Ta3-Ta4</b> | 2.62905                                                                           | 2.8013                                                                            | 2.56689                                                                           | 2.57968                                                                           | 2.60001                                                                           | 2.61793                                                                           | 2.55439                                                                           | 2.55891                                                                             | 2.56915                                                                             | 2.59076                                                                             | 2.62944                                                                             | 2.56406                                                                             | 2.56521                                                                             | 2.57954                                                                             | 2.6024                                                                              |
| <b>Ta1-Ta4</b> | 2.58104                                                                           | 2.5907                                                                            | 2.5904                                                                            | 2.59877                                                                           | 2.59902                                                                           | 2.58246                                                                           | 2.5921                                                                            | 2.57583                                                                             | 2.58239                                                                             | 2.58962                                                                             | 2.58096                                                                             | 2.60473                                                                             | 2.58755                                                                             | 2.593                                                                               | 2.60213                                                                             |
| <b>Ta2-Ta4</b> | 2.59164                                                                           | 2.5786                                                                            | 2.48043                                                                           | 2.46998                                                                           | 2.64218                                                                           | 2.58799                                                                           | 2.78616                                                                           | 2.47428                                                                             | 2.46988                                                                             | 2.6206                                                                              | 2.59237                                                                             | 2.77211                                                                             | 2.4764                                                                              | 2.47438                                                                             | 2.63388                                                                             |
| <b>Ta1-Ta3</b> | 2.58115                                                                           | 2.60688                                                                           | 2.5343                                                                            | 2.53295                                                                           | 2.72281                                                                           | 2.58259                                                                           | 2.61781                                                                           | 2.52506                                                                             | 2.52819                                                                             | 2.71311                                                                             | 2.58101                                                                             | 2.61794                                                                             | 2.52864                                                                             | 2.53773                                                                             | 2.72331                                                                             |
| <b>Ta1-N1</b>  | 2.04537                                                                           | 2.04236                                                                           | 1.92841                                                                           | 1.92436                                                                           | 1.85094                                                                           | 2.02556                                                                           | 2.05497                                                                           | 1.94026                                                                             | 1.93317                                                                             | 1.85581                                                                             | 2.04112                                                                             | 2.02827                                                                             | 1.92427                                                                             | 1.90896                                                                             | 1.83591                                                                             |
| <b>Ta1-N2</b>  |                                                                                   |                                                                                   |                                                                                   |                                                                                   |                                                                                   |                                                                                   |                                                                                   |                                                                                     |                                                                                     |                                                                                     |                                                                                     |                                                                                     |                                                                                     |                                                                                     |                                                                                     |
| <b>Ta2-N1</b>  | 2.15814                                                                           | 2.35143                                                                           | 2.23764                                                                           | 2.15198                                                                           | 1.90701                                                                           | 2.15173                                                                           | 2.23917                                                                           | 2.22235                                                                             | 2.15608                                                                             | 1.9148                                                                              | 2.135                                                                               | 2.18804                                                                             | 2.20343                                                                             | 2.11612                                                                             | 1.8977                                                                              |
| <b>Ta2-N2</b>  | 2.21616                                                                           | 2.42092                                                                           | 1.97115                                                                           | 1.93923                                                                           | 1.9078                                                                            | 2.1951                                                                            | 2.15171                                                                           | 1.96937                                                                             | 1.94022                                                                             | 1.91558                                                                             | 2.19197                                                                             | 2.12912                                                                             | 1.95865                                                                             | 1.91728                                                                             | 1.89802                                                                             |
| <b>Ta3-N1</b>  |                                                                                   |                                                                                   | 2.23483                                                                           | 2.31594                                                                           |                                                                                   |                                                                                   |                                                                                   | 2.23401                                                                             | 2.30126                                                                             |                                                                                     |                                                                                     |                                                                                     | 2.21046                                                                             | 2.30258                                                                             |                                                                                     |
| <b>Ta3-N2</b>  |                                                                                   |                                                                                   | 2.01518                                                                           | 1.96782                                                                           | 1.85043                                                                           |                                                                                   |                                                                                   | 2.02674                                                                             | 1.97954                                                                             | 1.85534                                                                             |                                                                                     |                                                                                     | 2.00475                                                                             | 1.94323                                                                             | 1.83568                                                                             |
| <b>N1-N2</b>   | 1.18745                                                                           | 1.24672                                                                           | 1.454                                                                             | 1.6375                                                                            |                                                                                   | 1.20733                                                                           | 1.25761                                                                           | 1.46239                                                                             | 1.63096                                                                             |                                                                                     | 1.18614                                                                             | 1.24254                                                                             | 1.43319                                                                             | 1.69166                                                                             |                                                                                     |

**Table S16.** Calculated distances in Å of atoms within in the doublet state along the activation pathway of the first N<sub>2</sub> molecule from I<sub>2(4,1)</sub> to P<sub>vic(4,1)</sub>.

|                | TPSSH                                                                             |                                                                                   |                                                                                   |                                                                                   |                                                                                   | riCC2                                                                             |                                                                                    |                                                                                     |
|----------------|-----------------------------------------------------------------------------------|-----------------------------------------------------------------------------------|-----------------------------------------------------------------------------------|-----------------------------------------------------------------------------------|-----------------------------------------------------------------------------------|-----------------------------------------------------------------------------------|------------------------------------------------------------------------------------|-------------------------------------------------------------------------------------|
|                | I <sub>2(4,1)</sub>                                                               | TS <sub>23(4,1)</sub>                                                             | I <sub>3(4,1)</sub>                                                               | TS <sub>3P<sub>vic(4,1)</sub></sub>                                               | P <sub>vic(4,1)</sub>                                                             | I <sub>2(4,1)</sub>                                                               | TS <sub>23(4,1)</sub>                                                              | I <sub>3(4,1)</sub>                                                                 |
|                |  |  |  |  |  |  |  |  |
| <b>Ta1-Ta2</b> | 2.65011                                                                           | 2.59638                                                                           | 2.94698                                                                           | 2.99392                                                                           | 2.81875                                                                           | 2.60103                                                                           | 2.57941                                                                            | 2.95411                                                                             |
| <b>Ta2-Ta3</b> | 2.58543                                                                           | 2.47599                                                                           | 2.87627                                                                           | 2.82788                                                                           | 2.81888                                                                           | 2.54261                                                                           | 2.3976                                                                             | 2.79764                                                                             |
| <b>Ta3-Ta4</b> | 2.61885                                                                           | 2.52904                                                                           | 2.55728                                                                           | 2.56923                                                                           | 2.58887                                                                           | 2.7015                                                                            | 2.64785                                                                            | 2.50717                                                                             |
| <b>Ta1-Ta4</b> | 2.5768                                                                            | 2.60134                                                                           | 2.57374                                                                           | 2.58095                                                                           | 2.58859                                                                           | 2.5709                                                                            | 2.60455                                                                            | 2.56382                                                                             |
| <b>Ta2-Ta4</b> | 2.58532                                                                           | 2.77862                                                                           | 2.47722                                                                           | 2.46714                                                                           | 2.63041                                                                           | 2.54215                                                                           | 2.57809                                                                            | 2.41448                                                                             |
| <b>Ta1-Ta3</b> | 2.57707                                                                           | 2.60288                                                                           | 2.5224                                                                            | 2.5205                                                                            | 2.7055                                                                            | 2.55912                                                                           | 2.64278                                                                            | 2.53324                                                                             |
| <b>Ta1-N1</b>  | 2.02394                                                                           | 2.04654                                                                           | 1.93295                                                                           | 1.9298                                                                            | 1.85178                                                                           | 2.02402                                                                           | 2.22505                                                                            | 2.01614                                                                             |
| <b>Ta1-N2</b>  |                                                                                   |                                                                                   |                                                                                   |                                                                                   |                                                                                   |                                                                                   |                                                                                    |                                                                                     |
| <b>Ta2-N1</b>  | 2.13369                                                                           | 2.18569                                                                           | 2.20682                                                                           | 2.14083                                                                           | 1.90694                                                                           | 2.1085                                                                            | 2.27548                                                                            | 2.23521                                                                             |
| <b>Ta2-N2</b>  | 2.18297                                                                           | 2.12726                                                                           | 1.9678                                                                            | 1.94123                                                                           | 1.90725                                                                           | 2.08954                                                                           | 2.20161                                                                            | 1.95075                                                                             |
| <b>Ta3-N1</b>  |                                                                                   |                                                                                   | 2.21589                                                                           | 2.28349                                                                           |                                                                                   |                                                                                   |                                                                                    | 2.24771                                                                             |
| <b>Ta3-N2</b>  |                                                                                   |                                                                                   | 2.01536                                                                           | 1.97124                                                                           | 1.85143                                                                           |                                                                                   |                                                                                    | 2.09205                                                                             |
| <b>Ta4-N1</b>  |                                                                                   |                                                                                   |                                                                                   |                                                                                   |                                                                                   |                                                                                   |                                                                                    |                                                                                     |
| <b>N1-N2</b>   | 1.2009                                                                            | 1.23751                                                                           | 1.46539                                                                           | 1.62748                                                                           |                                                                                   | 1.23047                                                                           | 1.1583                                                                             | 1.48957                                                                             |

## SI References

1. C. Berg, T. Schindler, G. Niedner-Schatteburg and V. E. Bondybey, *J. Chem. Phys.*, 1995, **102**, 4870-4884.
2. V. E. Bondybey and J. H. English, *J. Chem. Phys.*, 1981, **74**, 6978-6979.
3. D. Proch and T. Trickl, *Rev. Sci. Instrum.*, 1989, **60**, 713-716.
4. P. Caravatti and M. Allemann, *Org Mass Spectrom*, 1991, **26**, 514-518.
5. M. Graf, Diploma Technische Universität Kaiserslautern, 2006.
6. T. Su and M. T. Bowers, *International Journal of Mass Spectrometry and Ion Physics*, 1973, **12**, 347-356.
7. I. Balteanu, O. P. Balaj, B. S. Fox-Beyer, P. Rodrigues, M. T. Barros, A. M. C. Moutinho, M. L. Costa, M. K. Beyer and V. E. Bondybey, *Organometallics*, 2004, **23**, 1978-1985.
8. G. Kummerlöwe and M. K. Beyer, *International Journal of Mass Spectrometry*, 2005, **244**, 84-90.
9. M. J. Frisch, G. W. Trucks, H. B. Schlegel, G. E. Scuseria, M. A. Robb, J. R. Cheeseman, G. Scalmani, V. Barone, B. Mennucci, G. A. Petersson, H. Nakatsuji, M. Caricato, X. Li, H. P. Hratchian, A. F. Izmaylov, J. Bloino, G. Zheng, J. L. Sonnenberg, M. Hada, M. Ehara, K. Toyota, R. Fukuda, J. Hasegawa, M. Ishida, T. Nakajima, Y. Honda, O. Kitao, H. Nakai, T. Vreven, J. A. Montgomery Jr., J. E. Peralta, F. Ogliaro, M. J. Bearpark, J. Heyd, E. N. Brothers, K. N. Kudin, V. N. Staroverov, R. Kobayashi, J. Normand, K. Raghavachari, A. P. Rendell, J. C. Burant, S. S. Iyengar, J. Tomasi, M. Cossi, N. Rega, N. J. Millam, M. Klene, J. E. Knox, J. B. Cross, V. Bakken, C. Adamo, J. Jaramillo, R. Gomperts, R. E. Stratmann, O. Yazyev, A. J. Austin, R. Cammi, C. Pomelli, J. W. Ochterski, R. L. Martin, K. Morokuma, V. G. Zakrzewski, G. A. Voth, P. Salvador, J. J. Dannenberg, S. Dapprich, A. D. Daniels, Ö. Farkas, J. B. Foresman, J. V. Ortiz, J. Cioslowski and D. J. Fox, Gaussian 09, Revision D.01, Gaussian, Inc., Wallingford, CT, USA, 2009.
10. M. J. Frisch, G. W. Trucks, H. B. Schlegel, G. E. Scuseria, M. A. Robb, J. R. Cheeseman, G. Scalmani, V. Barone, G. A. Petersson, H. Nakatsuji, X. Li, M. Caricato, A. V. Marenich, J. Bloino, B. G. Janesko, R. Gomperts, B. Mennucci, H. P. Hratchian, J. V. Ortiz, A. F. Izmaylov, J. L. Sonnenberg, Williams, F. Ding, F. Lipparini, F. Egidi, J. Goings, B. Peng, A. Petrone, T. Henderson, D. Ranasinghe, V. G. Zakrzewski, J. Gao, N. Rega, G. Zheng, W. Liang, M. Hada, M. Ehara, K. Toyota, R. Fukuda, J. Hasegawa, M. Ishida, T. Nakajima, Y. Honda, O. Kitao, H. Nakai, T. Vreven, K. Throssell, J. A. Montgomery Jr., J. E. Peralta, F. Ogliaro, M. J. Bearpark, J. J. Heyd, E. N. Brothers, K. N. Kudin, V. N. Staroverov, T. A. Keith, R. Kobayashi, J. Normand, K. Raghavachari, A. P. Rendell, J. C. Burant, S. S. Iyengar, J. Tomasi, M. Cossi, J. M. Millam, M. Klene, C. Adamo, R. Cammi, J. W. Ochterski, R. L. Martin, K. Morokuma, O. Farkas, J. B. Foresman and D. J. Fox, Gaussian 16, Revision C.01, Gaussian, Inc., Wallingford, CT, USA, 2016.
11. J. P. Perdew, K. Burke and M. Ernzerhof, *Phys. Rev. Lett.*, 1996, **77**, 3865-3868.
12. C. Adamo and V. Barone, *J. Chem. Phys.*, 1999, **110**, 6158-6170.
13. F. Weigend and R. Ahlrichs, *PCCP*, 2005, **7**, 3297-3305.

14. D. Andrae, U. Häußermann, M. Dolg, H. Stoll and H. Preuß, *Theoretica Chimica Acta*, 1990, **77**, 123-141.
15. M. P. Klein, A. A. Ehrhard, J. Mohrbach, S. Dillinger and G. Niedner-Schatteburg, *Topics in Catalysis*, 2018, **61**, 106-118.
16. J. Mohrbach, S. Dillinger and G. Niedner-Schatteburg, *The Journal of Physical Chemistry C*, 2017, **121**, 10907-10918.
17. S. Dillinger, M. P. Klein, A. Steiner, D. C. McDonald, M. A. Duncan, M. M. Kappes and G. Niedner-Schatteburg, *The Journal of Physical Chemistry Letters*, 2018, **9**, 914-918.
18. C. Peng and H. Bernhard Schlegel, 1993, **33**, 449-454.
19. L. Fan, D. Harrison, L. Deng, T. K. Woo, D. Swerhone and T. Ziegler, *Can. J. Chem.*, 1995, **73**, 989-998.
20. K. Fukui, *Acc. Chem. Res.*, 1981, **14**, 363-368.
21. F. Weinhold and J. E. Carpenter, in *The Structure of Small Molecules and Ions*, eds. R. Naaman and Z. Vager, Springer US, Boston, MA, 1988, DOI: 10.1007/978-1-4684-7424-4\_24, pp. 227-236.
22. E. D. Glendening, C. R. Landis and F. Weinhold, 2013, **34**, 1429-1437.
23. T. A. Albright, J. K. Burdett and M. H. Whangbo, in *Orbital Interactions in Chemistry*, eds. T. A. Albright, J. K. Burdett and M. H. Whangbo, John Wiley & Sons, 2013, DOI: 10.1002/9781118558409.ch18, ch. 18, pp. 503-526.
24. M. D. Fryzuk, S. A. Johnson and S. J. Rettig, *J. Am. Chem. Soc.*, 1998, **120**, 11024-11025.
25. M. Zhou, X. Jin, Y. Gong and J. Li, *Angew. Chem. Int. Ed.*, 2007, **46**, 2911-2914.
26. Y. Gong, Zhao and M. Zhou, *J. Phys. Chem. A*, 2007, **111**, 6204-6207.
27. X. Cheng, Z.-Y. Li, L.-H. Mou, Y. Ren, Q.-Y. Liu, X.-L. Ding and S.-G. He, *Chemistry - A European Journal*, 2019, **25**, 16523-16527.
28. M. D. Fryzuk, S. A. Johnson, B. O. Patrick, A. Albinati, S. A. Mason and T. F. Koetzle, *J. Am. Chem. Soc.*, 2001, **123**, 3960-3973.
